# Supplementary material for: Predicting plant Rubisco kinetics from RbcL sequence data using machine learning
Source: PubMed Central journal article supplement (PMC9833099; doi:10.1093/jxb/erac368), 2022-09-12
Supplement: erac368_suppl_supplementary_figures_s1-s13_tables_s1-s2.pdf [file erac368_suppl_supplementary_figures_s1-s13_tables_s1-s2.pdf]

# Supplementary material

Predicting plant Rubisco kinetics from RbcL sequence data using machine learning

<sup>1</sup>Wasim A Iqbal, <sup>2</sup>Alexei Lisitsa and <sup>1</sup>Maxim V Kapralov

<sup>1</sup> School of Natural and Environmental Sciences, Newcastle University, Newcastle upon Tyne, NE1 7RU, United Kingdom

<sup>2</sup> Department of Computer Science, University of Liverpool, Liverpool, L69 3BX, United Kingdom

Email: [Maxim.Kapralov@ncl.ac.uk](mailto:Maxim.Kapralov@ncl.ac.uk)

Email : [W.Iqbal@ncl.ac.uk](mailto:W.Iqbal@ncl.ac.uk)

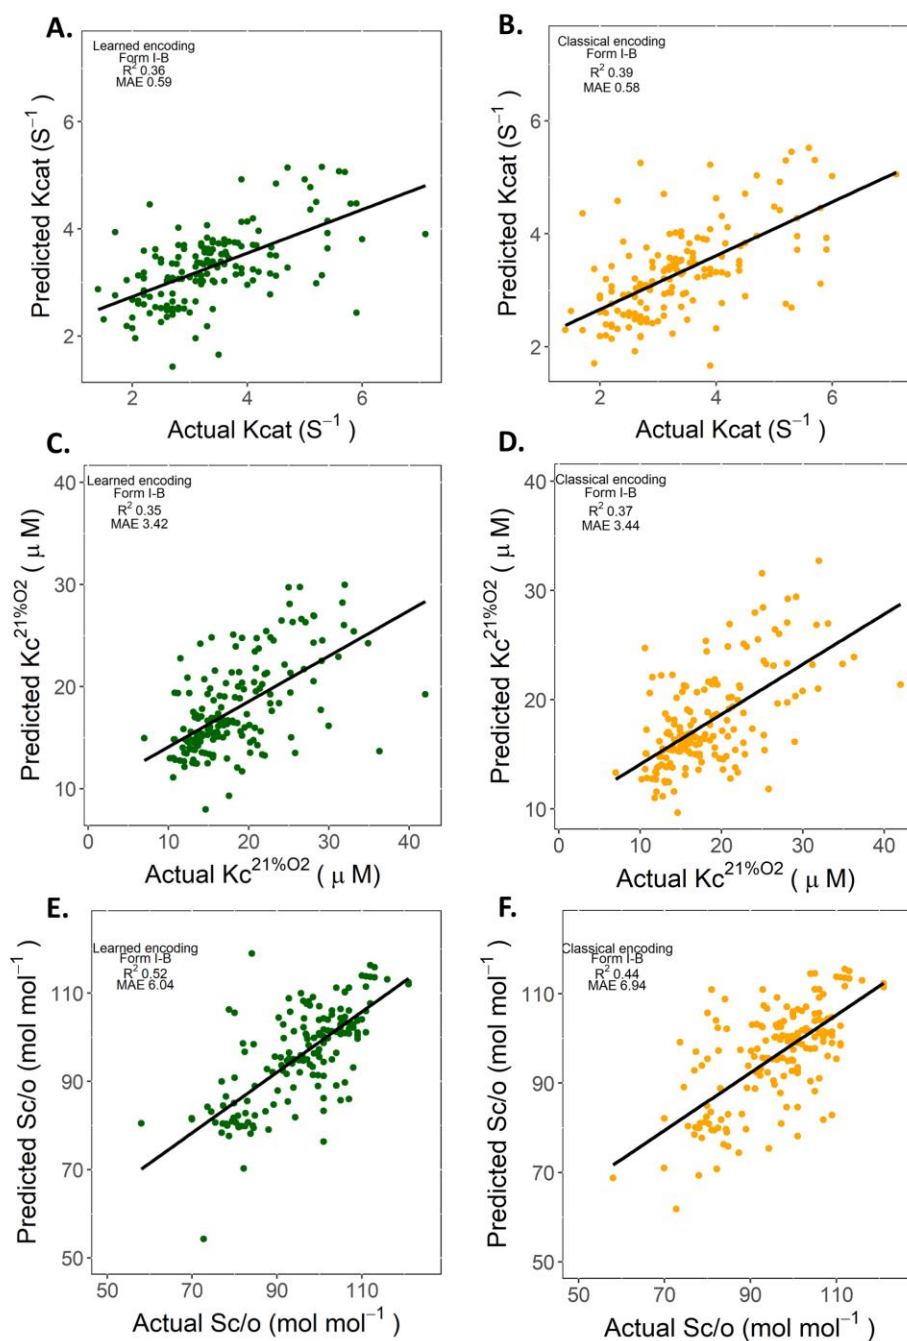

**Figure S1.** Comparison between predicted and actual carboxylation turnover rate (Kcat : s<sup>-1</sup>), Michaelis-Menten constant for CO<sub>2</sub> at ambient O<sub>2</sub> (Kc<sup>21%O<sub>2</sub></sup>: μM) and specificity for CO<sub>2</sub> over O<sub>2</sub> (Sc/o: mol mol<sup>-1</sup>) at 25°C. Determined using leave-one-out cross-validation with the learned encodings (Rives et al., 2021) (green) and classical encodings (orange) encoded by a single Matern 5/2 kernel. The poor performance of the single Matern 5/2 kernel approach justified the use of an additive Matern 5/2 kernel for the final gaussian process models (see paper Figure 2).

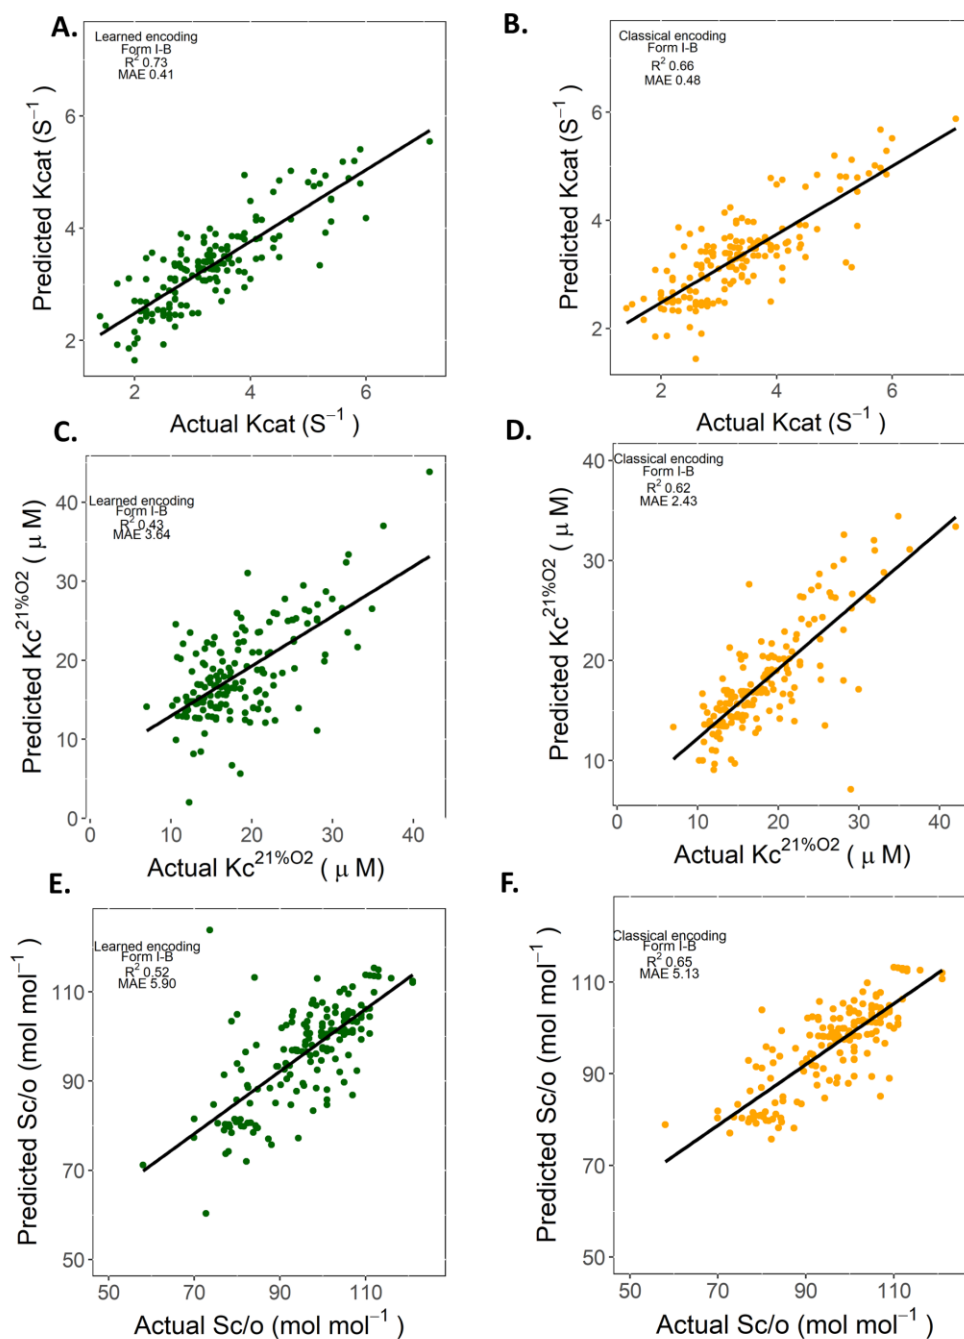

**Figure S2.** Comparison between predicted and actual carboxylation turnover rate (Kcat : s<sup>-1</sup>), Michaelis-Menten constant for CO<sub>2</sub> at ambient O<sub>2</sub> (Kc<sup>21%O<sub>2</sub></sup>: μM) and specificity for CO<sub>2</sub> over O<sub>2</sub> (Sc/o: mol mol<sup>-1</sup>) at 25°C. Determined using leave-one-out cross-validation with the learned encodings (Rives et al., 2021) (green) and classical encodings (orange) encoded by an additive linear kernel. The poor performance of the additive linear kernel approach justified the use of an additive Matern 5/2 kernel for the final gaussian process models (see paper Figure 2).

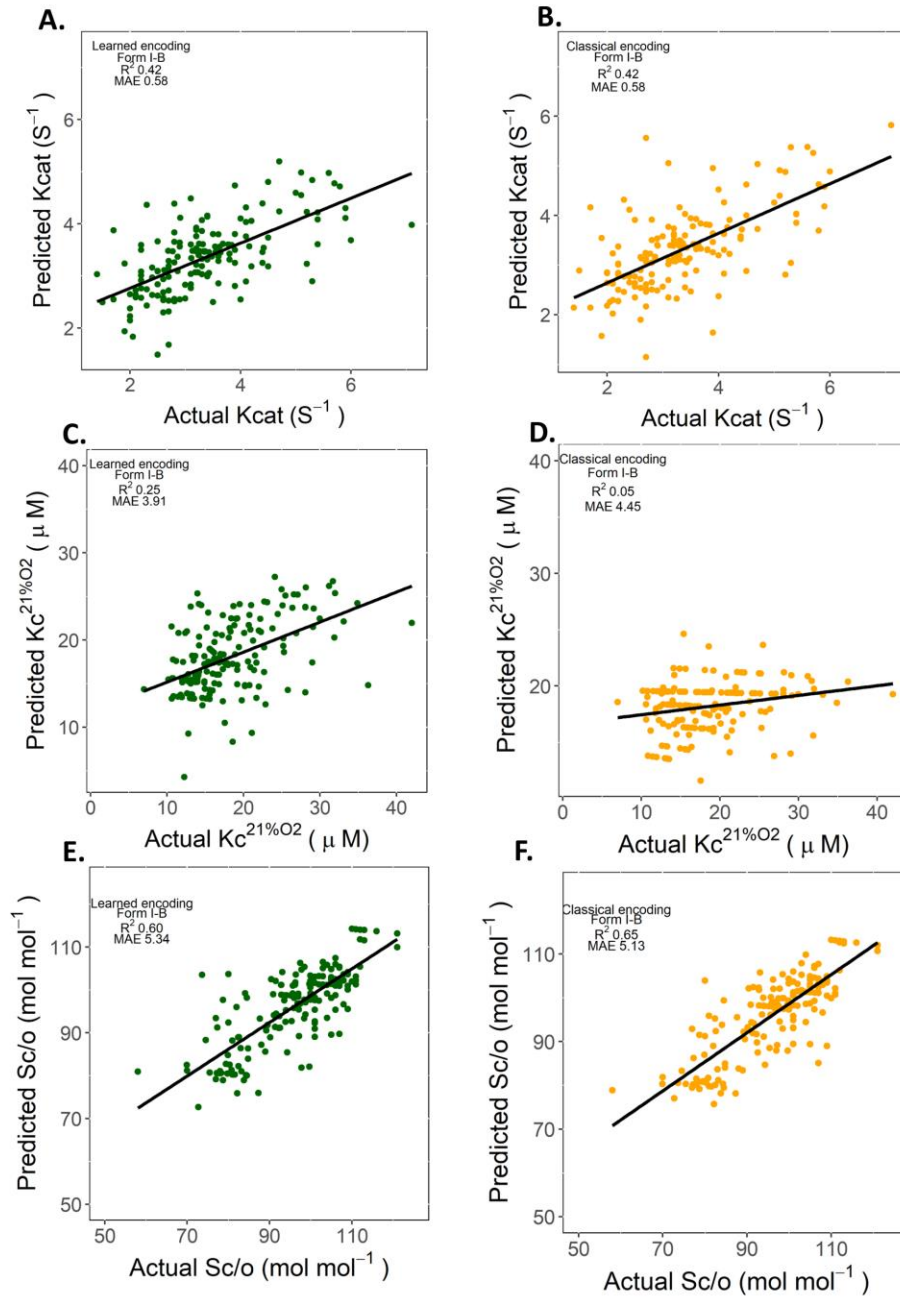

**Figure S3.** Comparison between predicted and actual carboxylation turnover rate ( $K_{cat}$  :  $s^{-1}$ ), Michaelis-Menten constant for  $CO_2$  at ambient  $O_2$  ( $K_c^{21\%O_2}$ :  $\mu M$ ) and specificity for  $CO_2$  over  $O_2$  ( $Sc/o$ :  $mol\ mol^{-1}$ ) at  $25^\circ C$ . Determined using leave-one-out cross-validation with the learned encodings (Rives et al., 2021) (green) and classical encodings (orange) encoded by a single linear kernel. The poor performance of the single linear kernel approach justified the use of an additive Matern 5/2 kernel for the final gaussian process models (see paper Figure 2).

**Table S1.** Average performance of the learned encoding scheme across five randomly chosen sets of untrained weights determined using leave-one-out cross validation.

| Model configuration        | Task                | R <sup>2</sup> | MAE         |
|----------------------------|---------------------|----------------|-------------|
| Additive Matern 5/2 kernel | Kcat                | 0.79 ± 0.01    | 0.40 ± 0.01 |
| Additive Matern 5/2 kernel | Kc <sup>21%O2</sup> | 0.82 ± 0.03    | 1.97 ± 0.17 |
| Additive Matern 5/2 kernel | Sc/o                | 0.79 ± 0.01    | 4.03 ± 0.12 |
| Single Matern 5/2 kernel   | Kcat                | 0.30 ± 0.02    | 0.65 ± 0.01 |
| Single Matern 5/2 kernel   | Kc <sup>21%O2</sup> | 0.25 ± 0.01    | 3.63 ± 0.04 |
| Single Matern 5/2 kernel   | Sc/o                | 0.66 ± 0.01    | 5.18 ± 0.06 |
| Additive linear kernel     | Kcat                | 0.63 ± 0.03    | 0.47 ± 0.02 |
| Additive linear kernel     | Kc <sup>21%O2</sup> | 0.56 ± 0.06    | 3.16 ± 0.22 |
| Additive linear kernel     | Sc/o                | 0.70 ± 0.04    | 4.89 ± 0.32 |
| Single linear kernel       | Kcat                | 0.37 ± 0.02    | 0.60 ± 0.01 |
| Single linear kernel       | Kc <sup>21%O2</sup> | 0.20 ± 0.03    | 3.94 ± 0.09 |
| Single linear kernel       | Sc/o                | 0.63 ± 0.01    | 5.41 ± 0.07 |

The learned encoding scheme is based on a fixed pre-trained neural network. Randomly assigning untrained weights led to minor differences in performance. This demonstrates that the boost in performance from the pretrained learned encoding scheme (e.g. Figure 2) is most likely driven by the neural network architecture. Mean ± SD performance metrics across five randomly chosen sets of untrained weights. Mean absolute errors (MAE) are in the units of the corresponding task outcomes i.e. Kcat (s<sup>-1</sup>), Kc<sup>21%O2</sup> (μM) or Sc/o (mol mol<sup>-1</sup>).

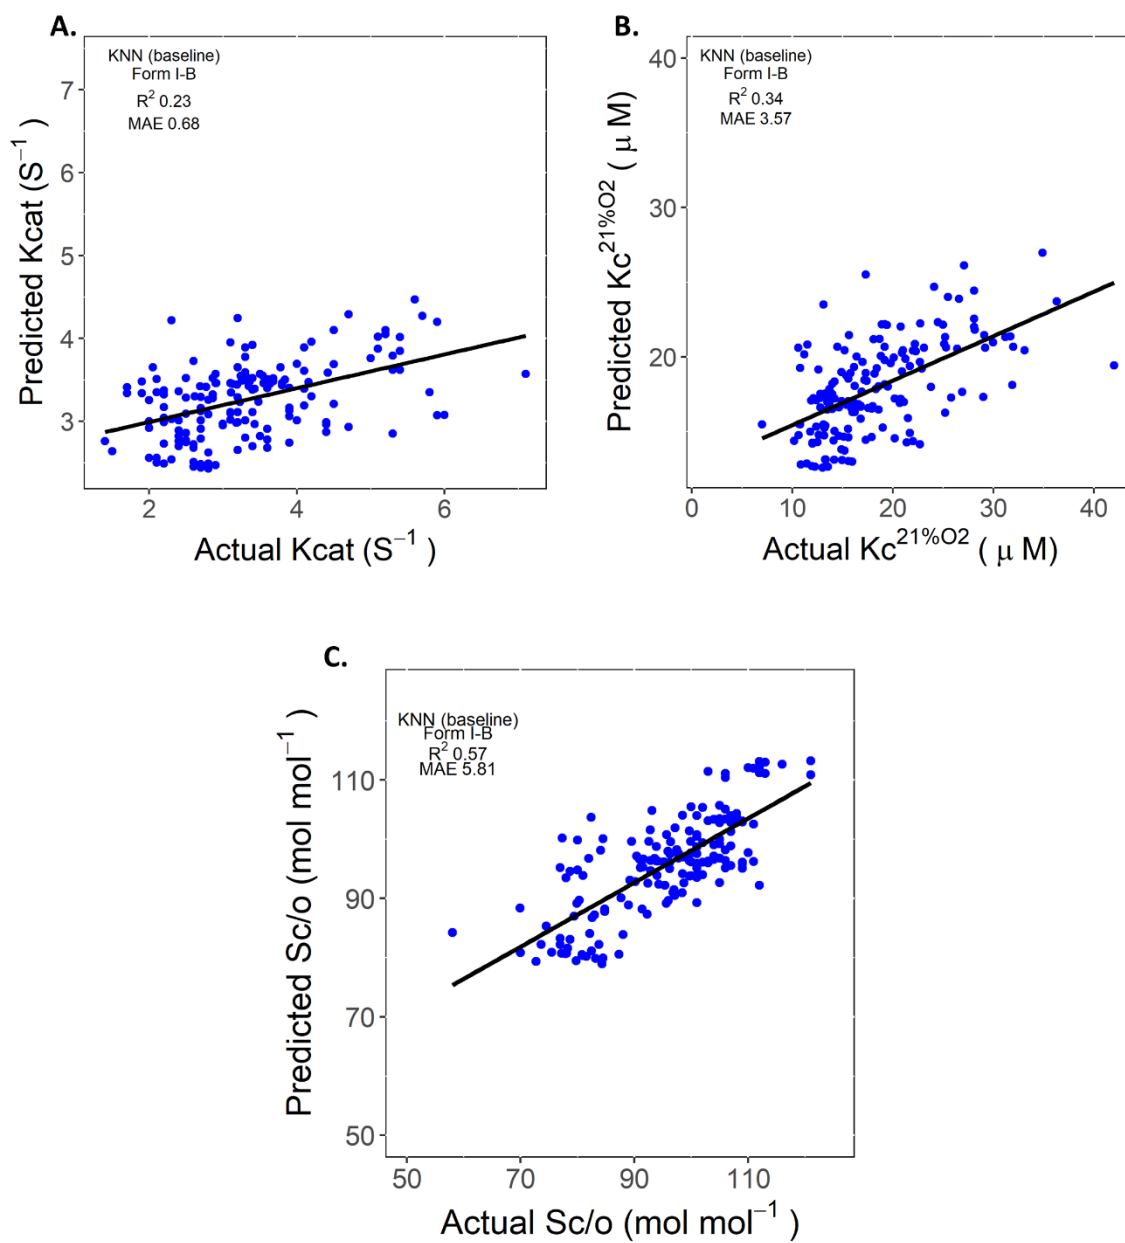

**Figure S4.** Comparison between predicted and actual carboxylation turnover rate ( $K_{cat}$  :  $s^{-1}$ ), Michaelis-Menten constant for  $CO_2$  at ambient  $O_2$  ( $K_c^{21\%O_2}$ :  $\mu M$ ) and specificity for  $CO_2$  over  $O_2$  ( $Sc/o$ :  $mol\ mol^{-1}$ ) at  $25^\circ C$ . Determined using leave-one-out cross-validation with K-nearest neighbour (KNN) sequence-similarity (baseline) models.

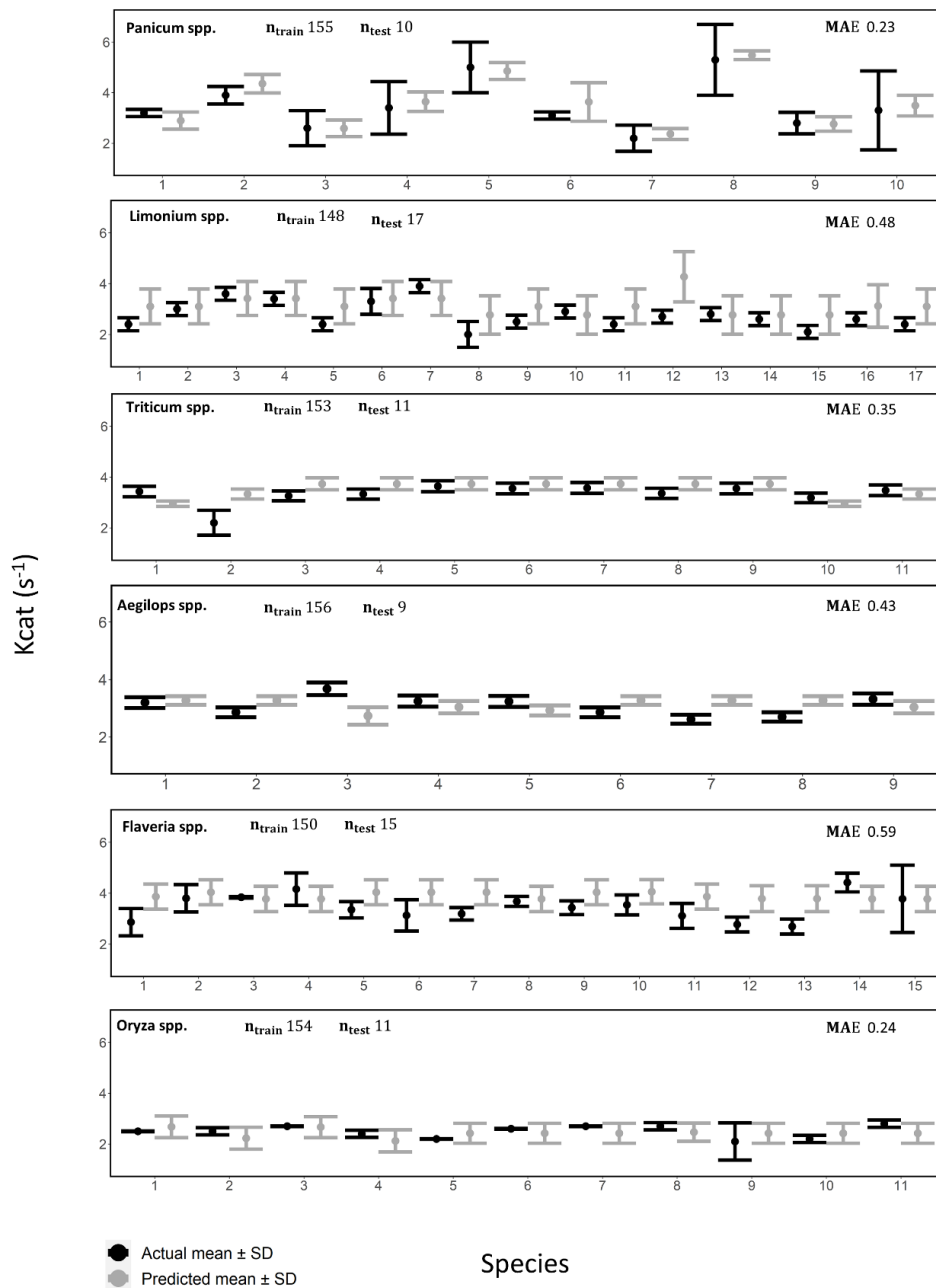

**Figure S5.** Leave-genus-out cross validation plots for carboxylation turnover rate ( $K_{cat}$ ). Another validation framework that involved leaving a genus out during model training and then evaluating the model using the unseen genus. For example, *Panicum* spp. were removed during model training leaving 155 other species for training ( $n_{train}$ ) and the model performance was assessed using the 10 unseen *Panicum* spp. ( $n_{test}$ ). This process was repeated for each genus with more than one species. Each pair of results show the actual (black) and predicted (grey) mean  $K_{cat} \pm SD$ . Actual or experimental SDs were calculated from the reported standard errors (SE) and number of replicates (see methods section). The mean absolute error (MAE) between the predicted and actual values are shown for each genus group.

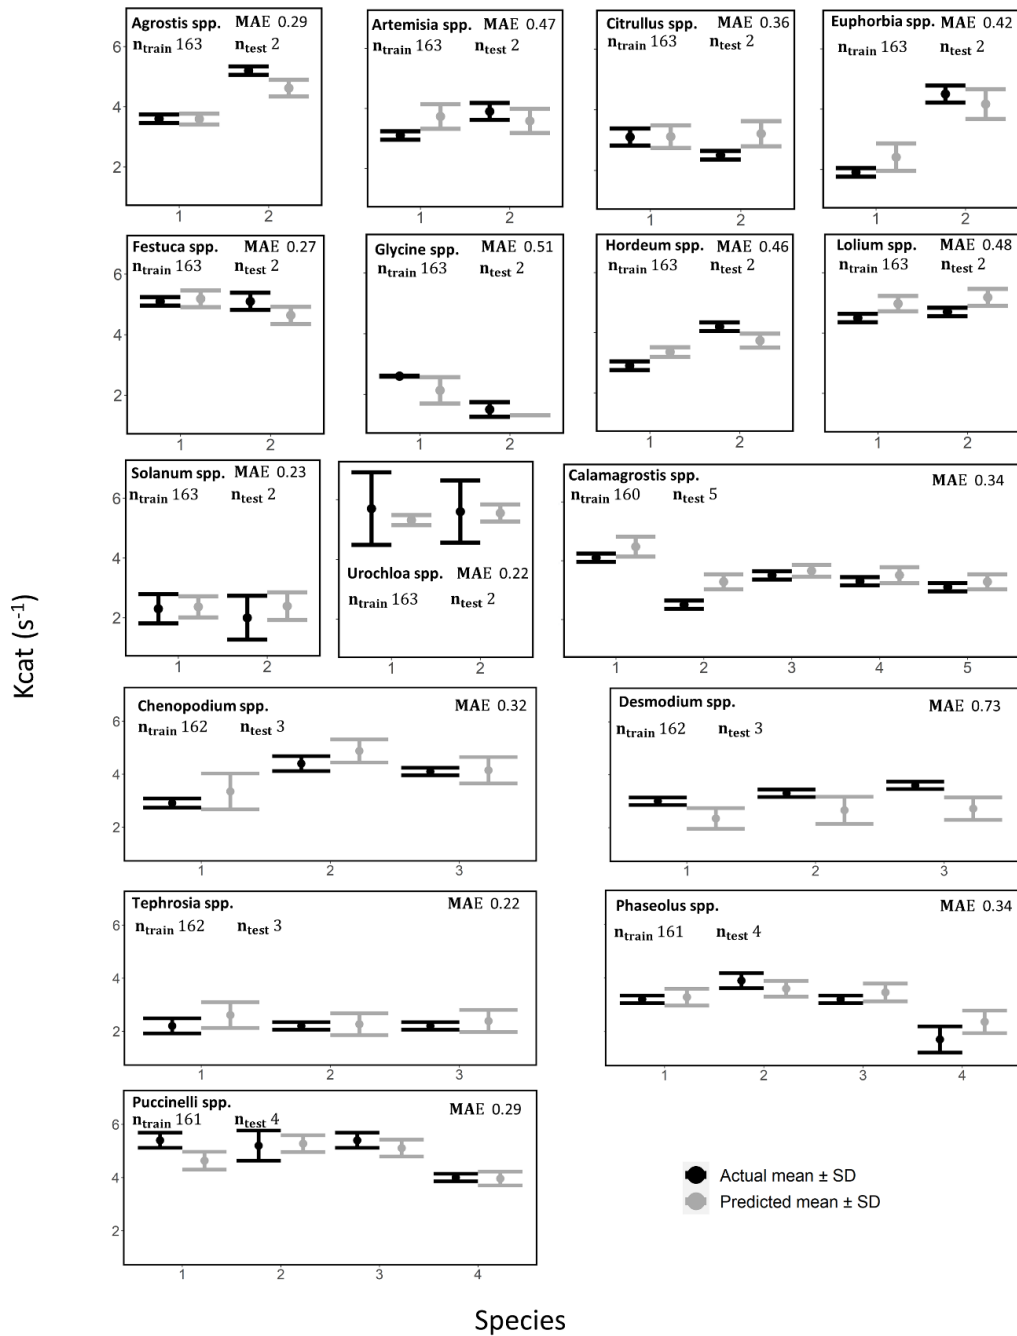

**Figure S5 continued.** Leave-genus-out cross validation plots for Kcat.



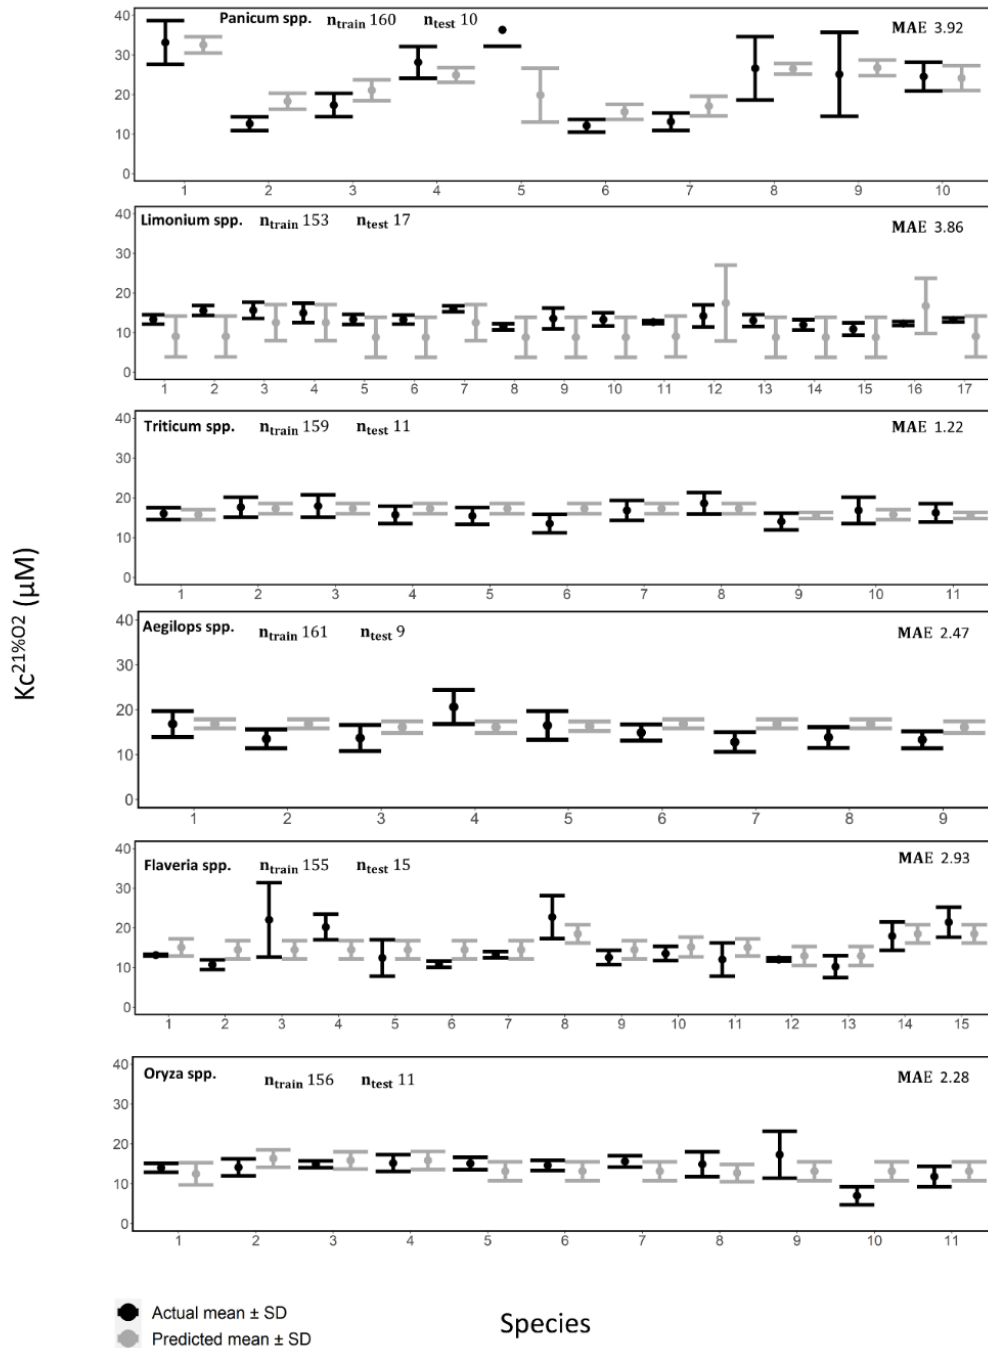

**Figure S6.** Leave-genus-out cross validation plots for the Michaelis-Menten constant for  $CO_2$  at ambient atmospheric  $O_2$  ( $K_c^{21\%O_2}$ ). Same process as figure S4. Each pair of results show the actual (black) and predicted (grey) mean  $K_c^{21\%O_2} \pm SD$ . Actual or experimental SDs were calculated from the reported standard errors (SE) and number of replicates (see methods section). The mean absolute error (MAE) between the predicted and actual values are shown for each genus group.

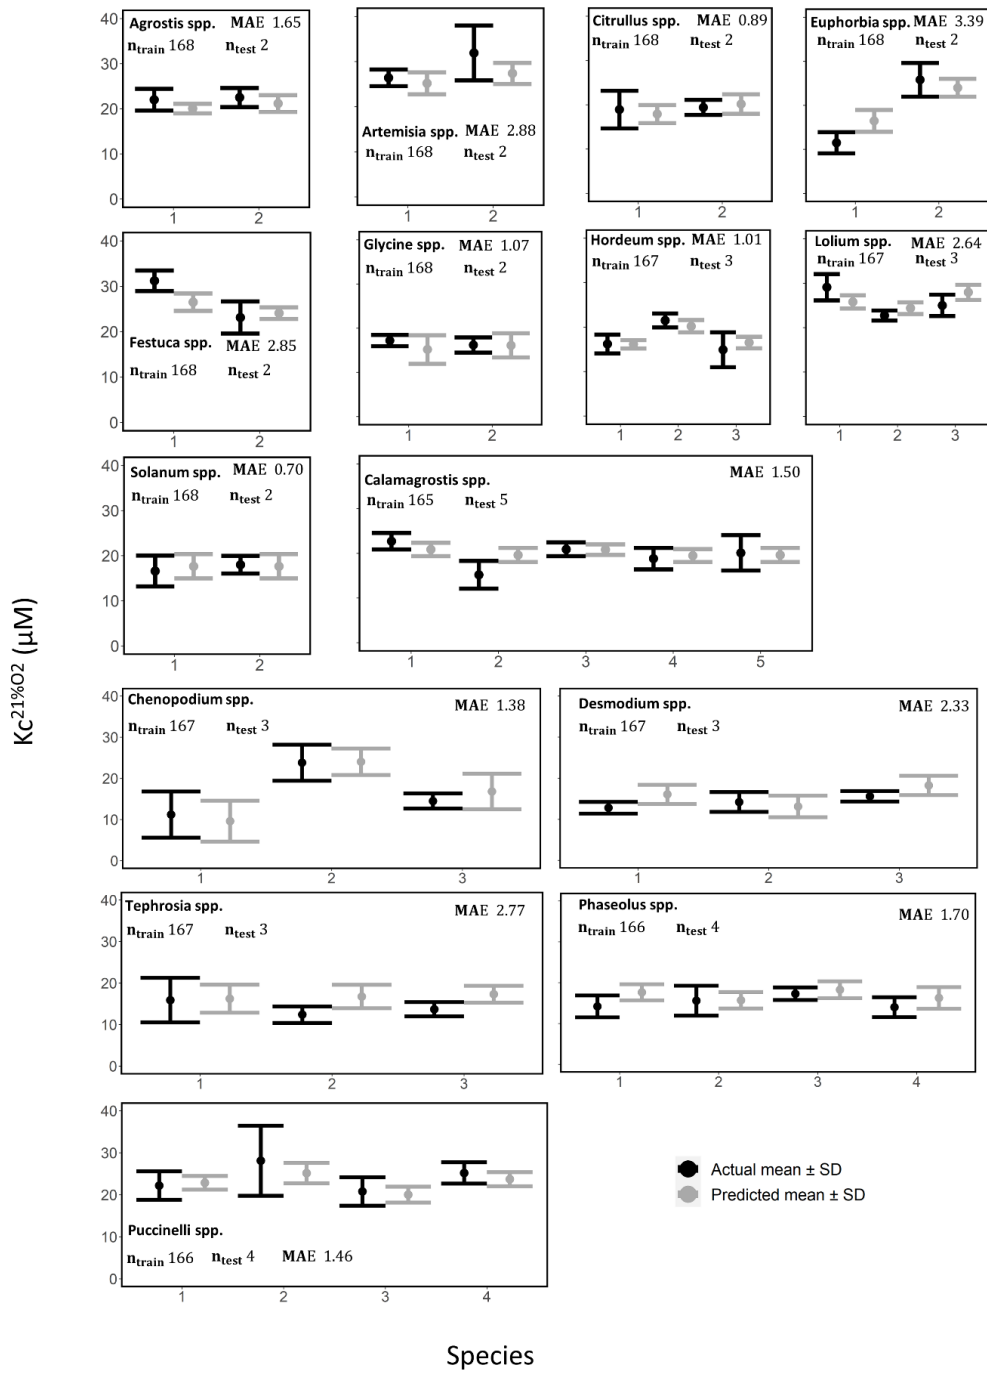

Figure S6 continued. Leave-genus-out cross validation plots for  $Kc^{21\%O_2}$ .

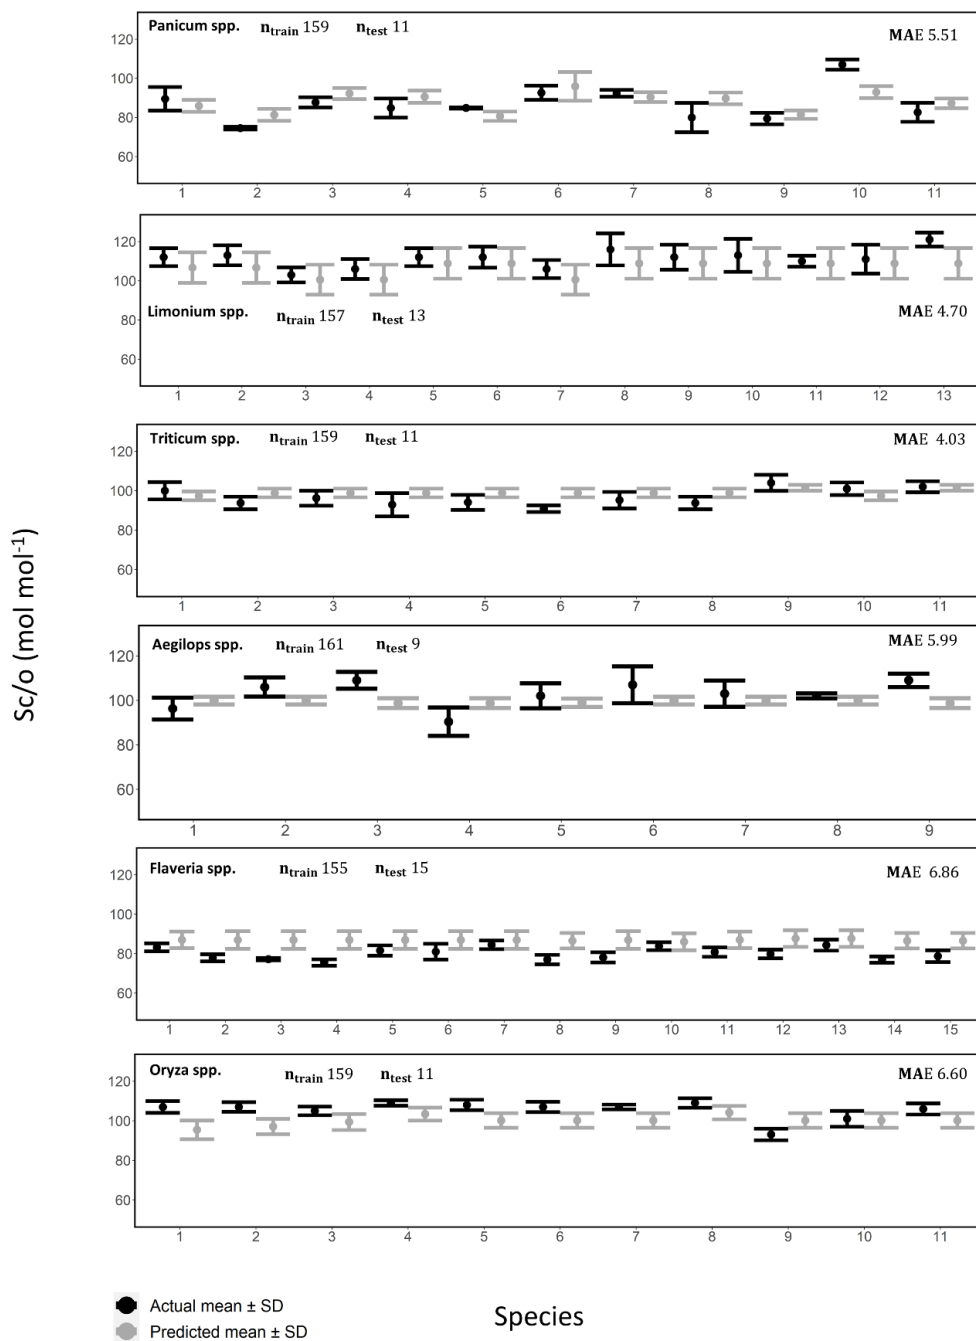

**Figure S7.** Leave-genus-out cross validation plots for the specificity for CO<sub>2</sub> over O<sub>2</sub> (Sc/o). Same process as figure S4. Each pair of results show the actual (black) and predicted (grey) mean Sc/o ± SD. Actual or experimental SDs were calculated from the reported standard errors (SE) and number of replicates (see methods section). The mean absolute error (MAE) between the predicted and actual values are shown for each genus group.

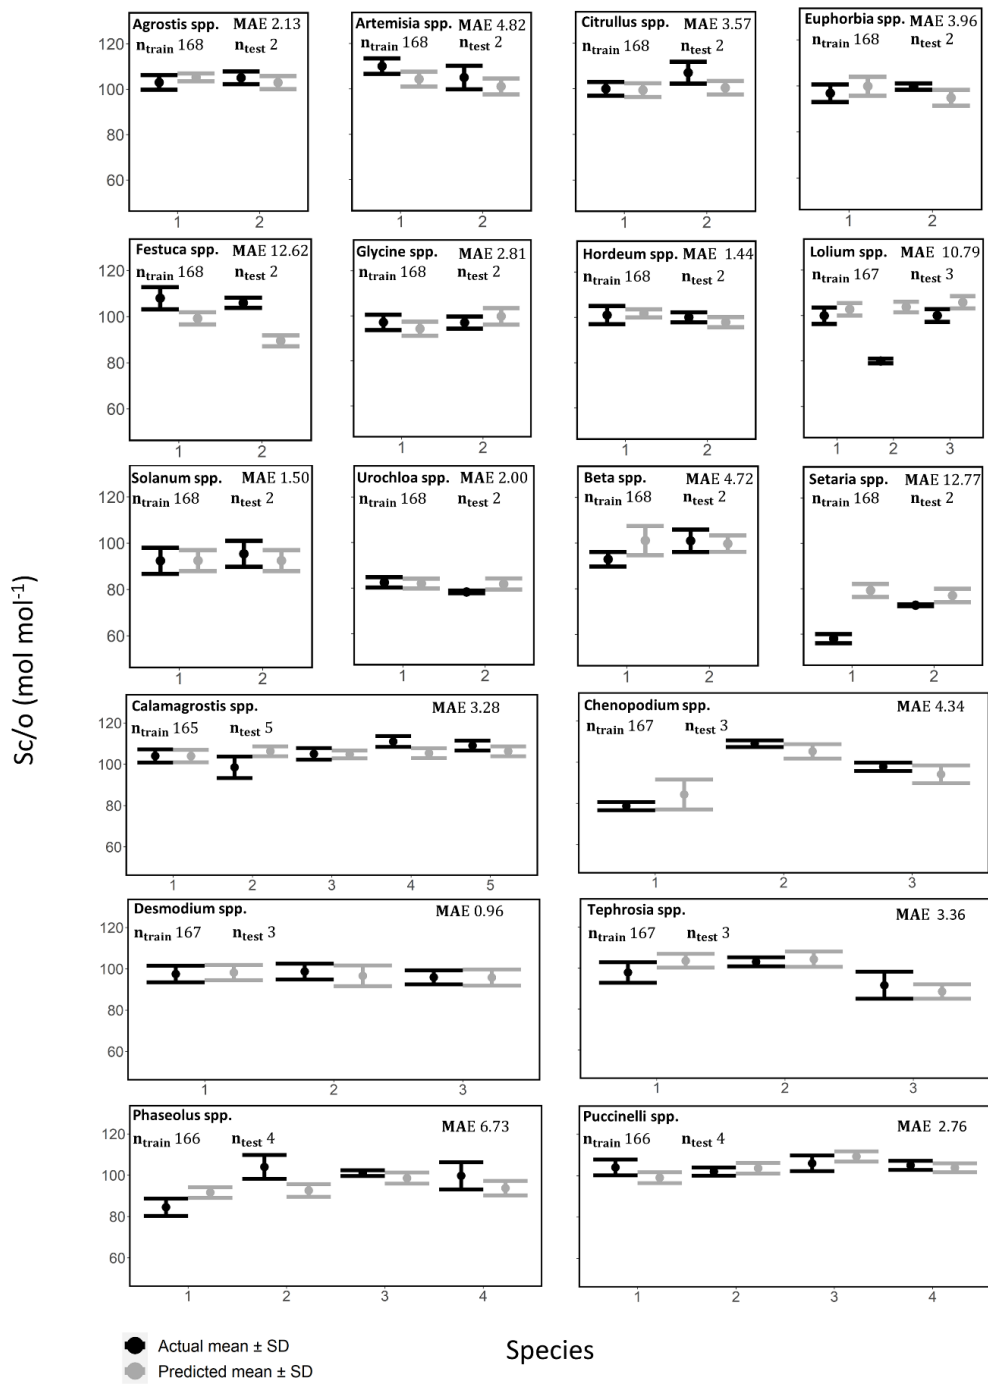

Figure S7. Continued. Leave-genus-out cross validation plots for  $Sc/o$ .

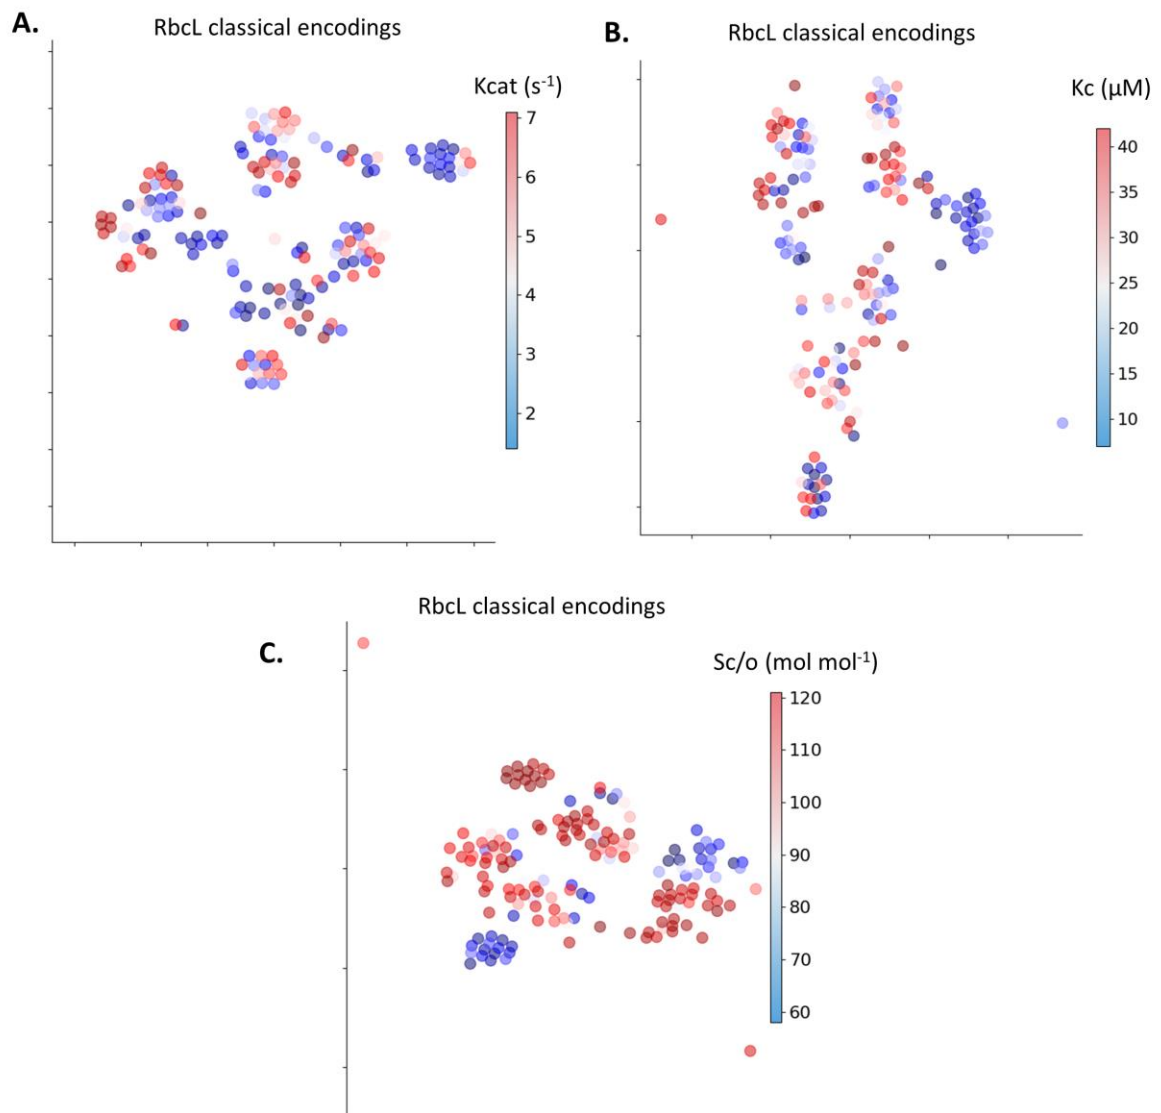

**Figure S8.** Visualization of the Rubisco large subunit (RbcL) classical encodings used in the fully trained Gaussian process (GP) models. Each data point represents an RbcL classical encoding with (A) carboxylation turnover rate ( $K_{cat}$ :  $s^{-1}$ ) ( $n=165$ ), (B) Michaelis-Menten constant for  $CO_2$  at ambient atmospheric  $O_2$  ( $K_c^{21\%O_2}$ :  $\mu M$ ) ( $n=170$ ) and (C) specificity for  $CO_2$  over  $O_2$  ( $Sc/o$ :  $mol\ mol^{-1}$ ) ( $n=170$ ).

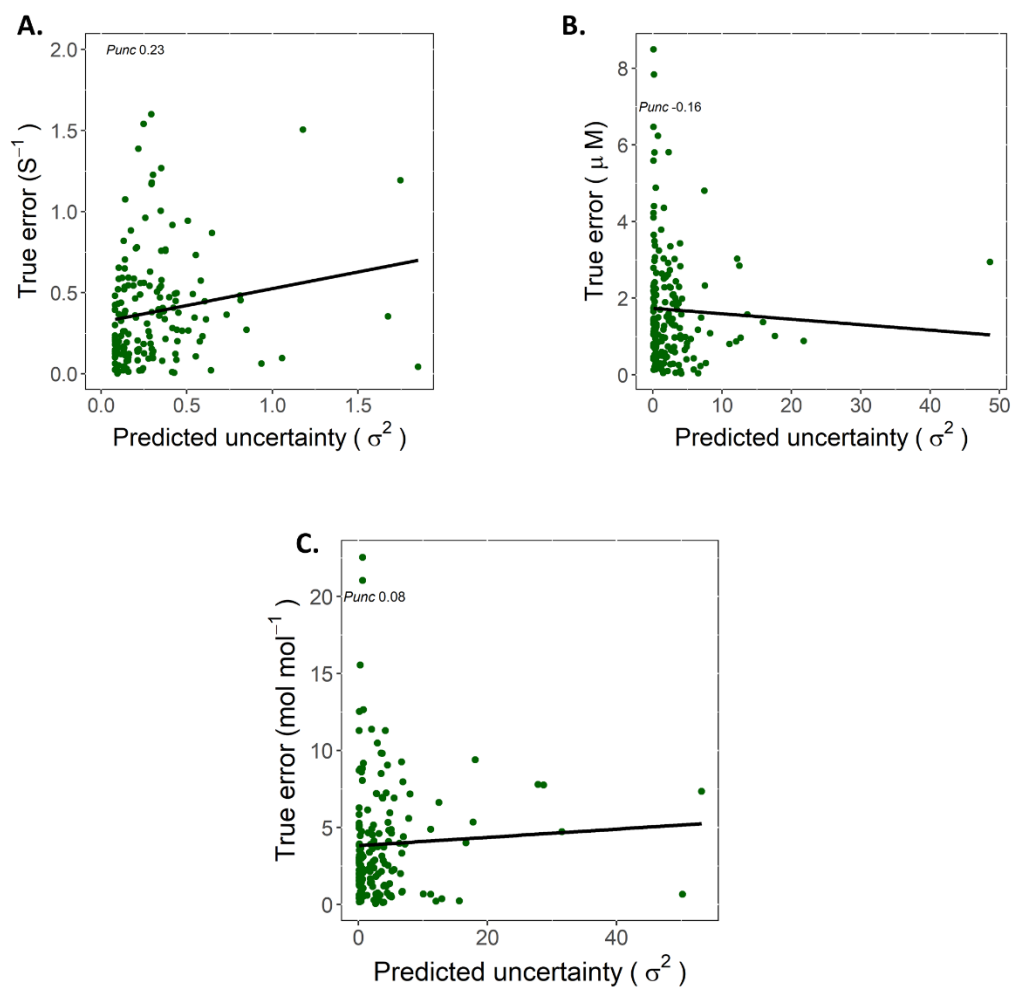

**Figure S9.** Spearman rank correlations ( $\rho_{unc}$ ) of leave-one-out cross validation predicted uncertainties ( $\sigma^2$ ) and true errors for (A) carboxylation turnover rate ( $K_{cat} : s^{-1}$ ), (B) Michaelis-Menten constant for  $CO_2$  at ambient  $O_2$  ( $K_C^{21\%O_2} : \mu M$ ) and (C) specificity for  $CO_2$  over  $O_2$  ( $Sc/o : mol\ mol^{-1}$ ). Determined using the learned encodings (Rives et al., 2021) encoded by an additive Matern 5/2 kernel.

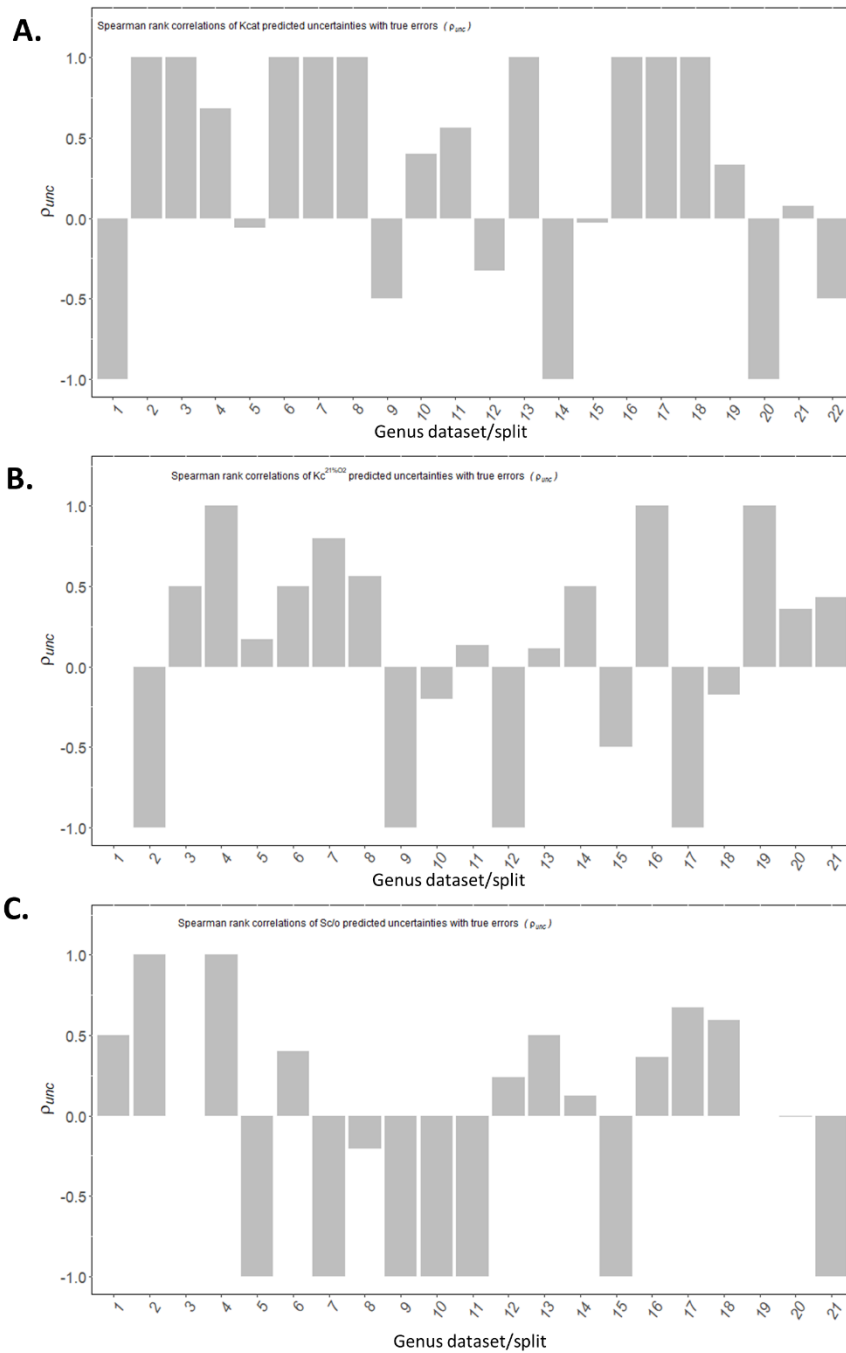

**Figure S10.** Spearman rank correlations ( $\rho_{unc}$ ) of leave-genus-out cross validation predicted uncertainties ( $\sigma^2$ ) and true errors for (A) carboxylation turnover rate (Kcat :  $s^{-1}$ ), (B) Michaelis-Menten constant for  $CO_2$  at ambient  $O_2$  ( $Kc^{21\%O_2}$ :  $\mu M$ ) and (C) specificity for  $CO_2$  over  $O_2$  (Sc/o:  $mol\ mol^{-1}$ ). Determined using the learned encodings (Rives et al., 2021) encoded by an additive Matern 5/2 kernel.  $\rho_{unc}$  values are ordered by the mean absolute error (MAE) for each genus group.

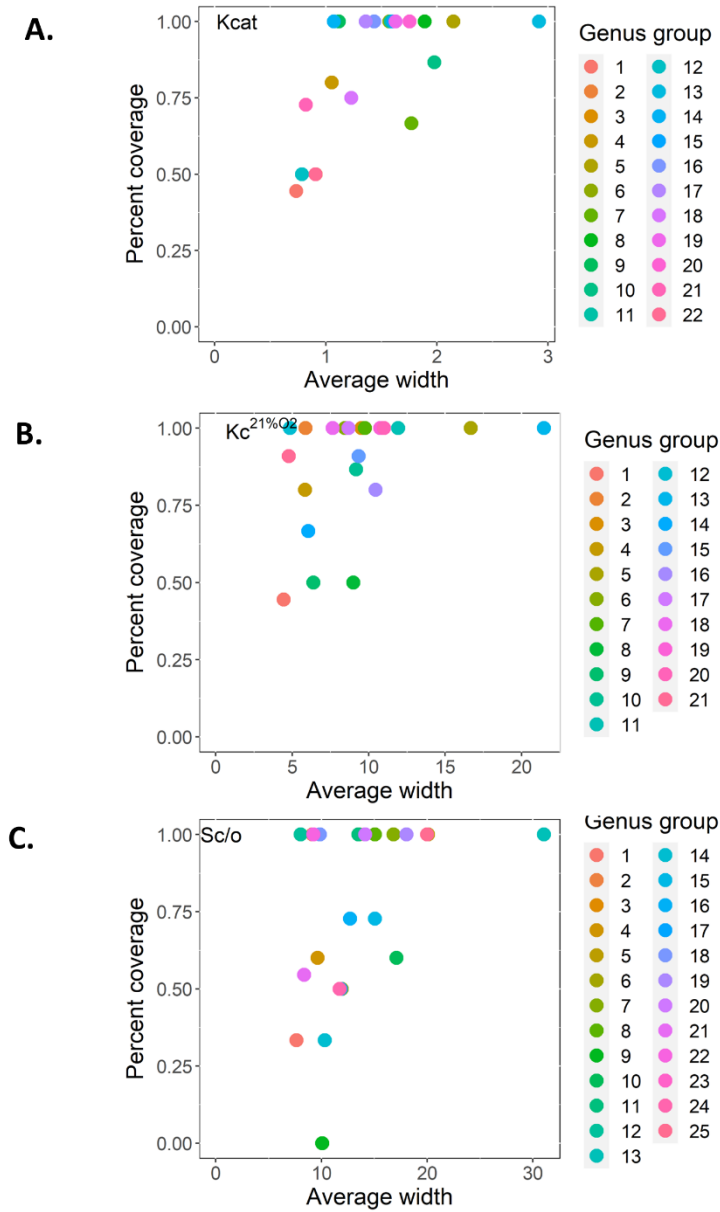

**Figure S11.** Coverage vs average width ( $4\sigma$ ) for (A) carboxylation turnover rate ( $K_{cat}$  :  $s^{-1}$ ), (B) Michaelis-Menten constant for  $CO_2$  at ambient  $O_2$  ( $Kc^{21\%O_2}$ :  $\mu M$ ) and (C) specificity for  $CO_2$  over  $O_2$  ( $Sc/o$ :  $mol\ mol^{-1}$ ) leave-genus-out cross validation predictions. Coverage is the percentage of actual mean values that fall within the predicted 95% confidence intervals ( $\pm 2\sigma$ ). High coverage and low width indicates good model uncertainty. As predicted mean values become increasingly out of distribution, we would like width to increase indicating increasing model uncertainty and coverage to remain high.



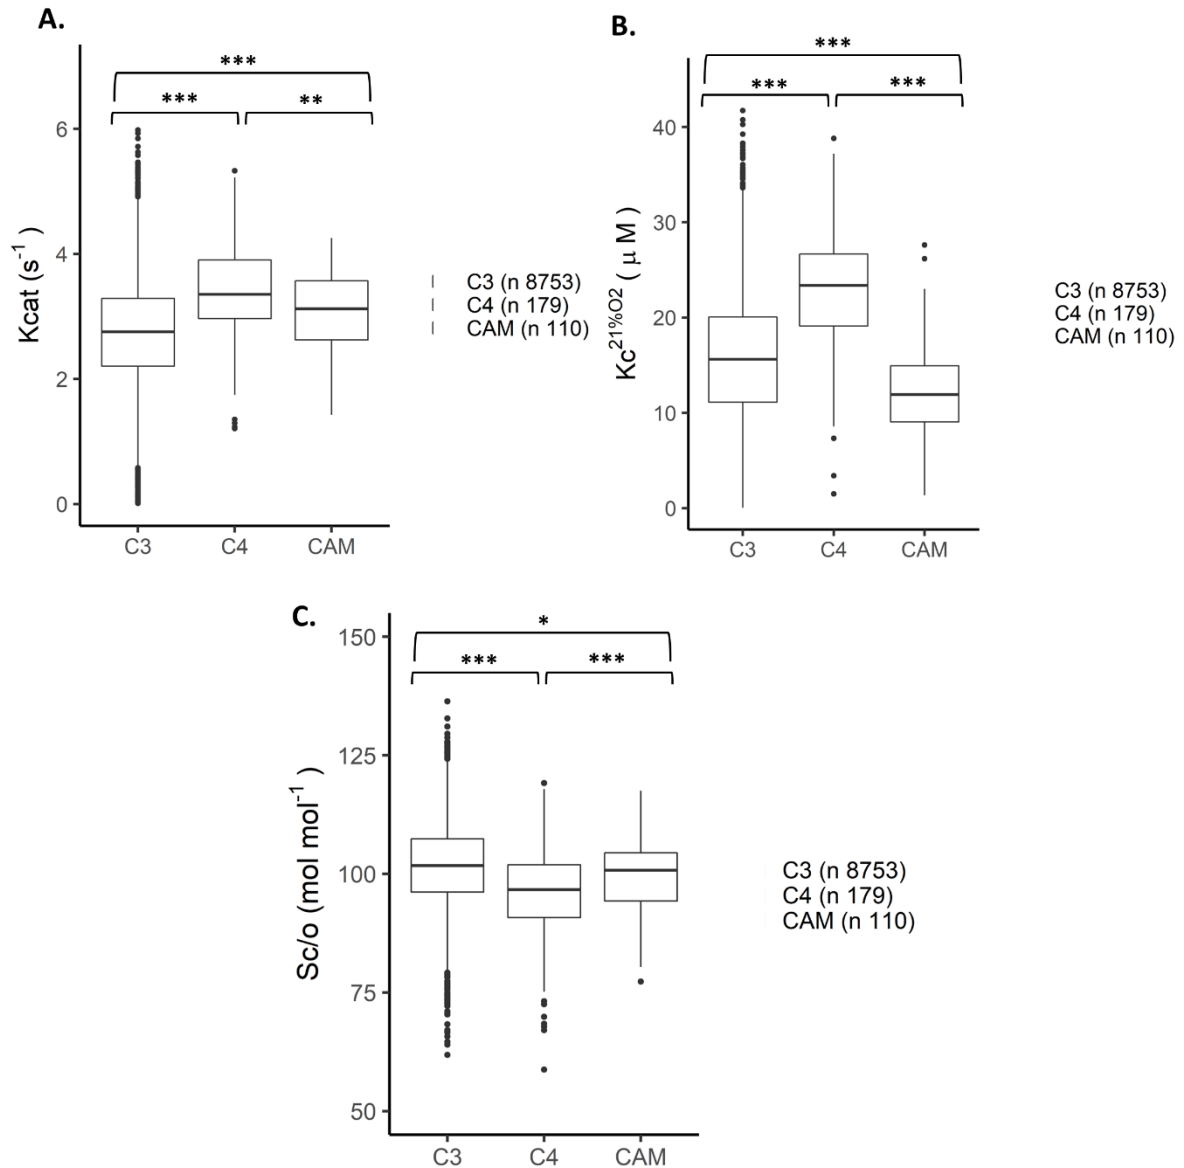

**Figure S12.** Box plots depict (A) carboxylation turnover rate ( $K_{cat}$ :  $s^{-1}$ ), (B) Michaelis-Menten constant for  $CO_2$  at ambient atmospheric  $O_2$  ( $K_c^{21\%O_2}$ :  $\mu M$ ) and (C) specificity of  $CO_2$  to  $O_2$  ( $Sc/o$ :  $mol\ mol^{-1}$ ) predictions made for the wild-type form IB (plants) Rubisco large subunit (RbL) sequence-space using the fully trained Gaussian process (GP) models with the learned encoding scheme. Predictions are shown for all known land plant Rubiscos. Predictions were grouped by photosynthesis metabolism type ( $C_3$ ,  $C_4$  or CAM). Box plot horizontal lines show the median value, and the box and whisker represent the 25<sup>th</sup> and 75<sup>th</sup> percentile and minimum to maximum distributions of the data. Significant differences from the one-way ANOVA with Duncan's post hoc test are shown for groups: \*\*\*  $p < 0.001$ , \*\*  $p < 0.01$ , \*  $p < 0.05$ , n.s., non significant.

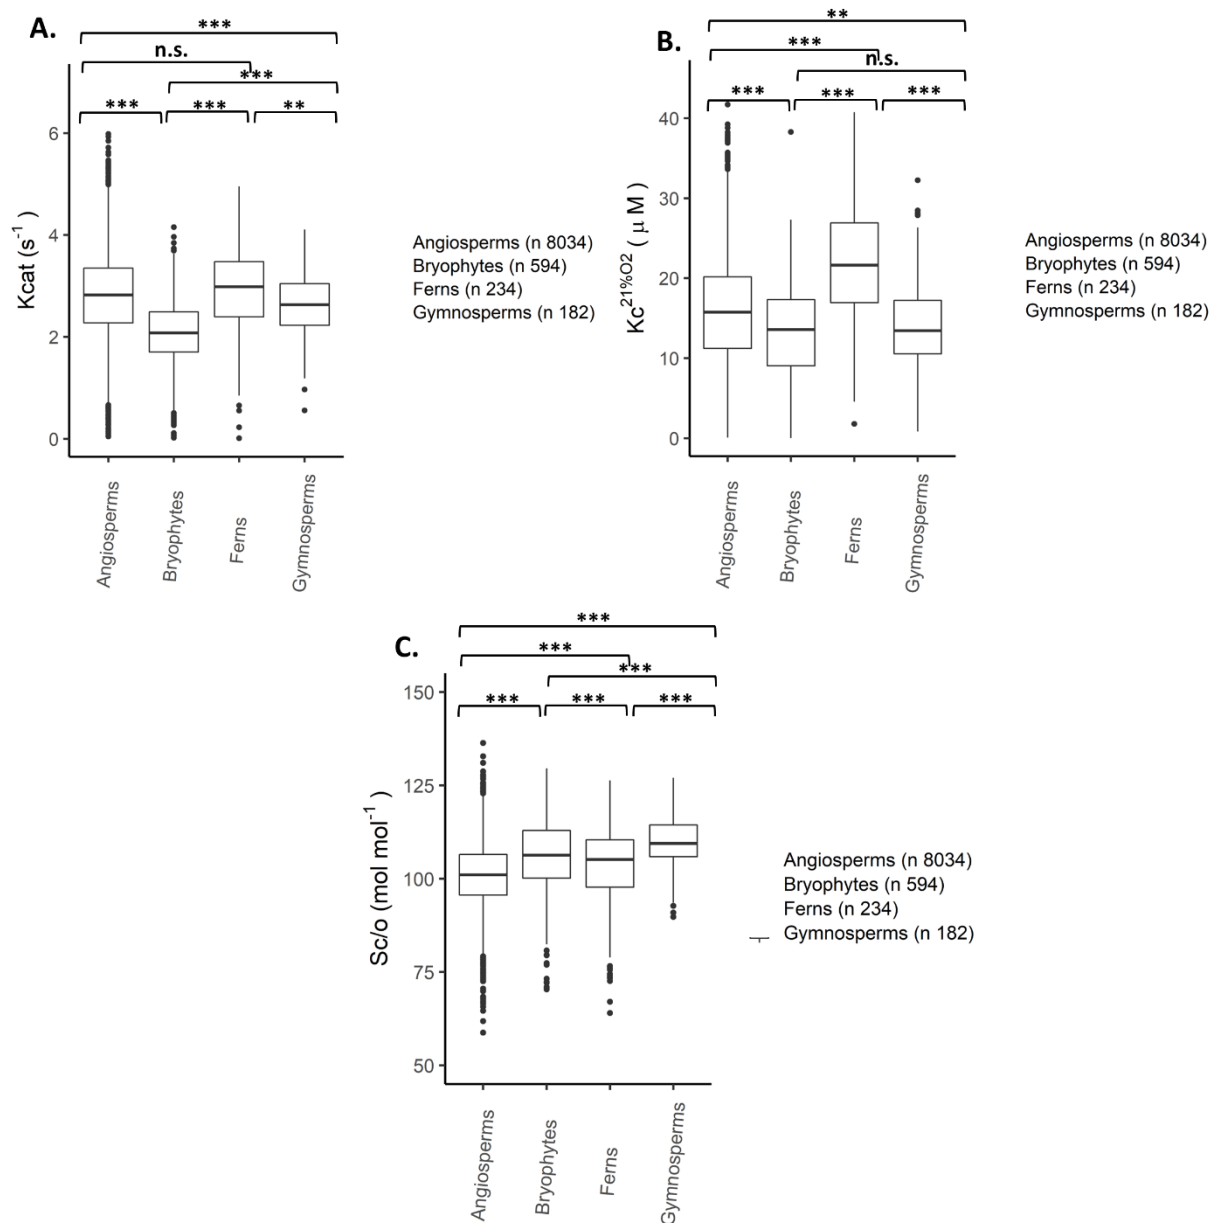

**Figure S13.** Box plots depict (A) carboxylation turnover rate ( $K_{cat}$ :  $s^{-1}$ ), (B) Michaelis-Menten constant for  $CO_2$  at ambient atmospheric  $O_2$  ( $K_C^{21\%O_2}$ :  $\mu M$ ) and (C) specificity of  $CO_2$  to  $O_2$  ( $Sc/o$ :  $mol\ mol^{-1}$ ) predictions made for the wild-type form IB (plants) Rubisco large subunit (RbcL) sequence-space using the fully trained Gaussian process (GP) models with the learned encoding scheme. Predictions are shown for all known land plant Rubiscos. Predictions were grouped by taxonomical type (Angiosperms, Ferns (including Pteridophytes and Lycopodiophytes) Gymnosperms or Bryophytes). Box plot horizontal lines show the median value, and the box and whisker represent the 25<sup>th</sup> and 75<sup>th</sup> percentile and minimum to maximum distributions of the data. Significant differences from the one-way ANOVA with Duncan's post hoc test are shown for groups: \*\*\*  $p < 0.001$ , \*\*  $p < 0.01$ , \*  $p < 0.05$ , n.s., non significant.

**Table S2.** Rubisco experimental kinetics and Rubisco large subunit (RbL) sequences for training Gaussian process models.

| Species                            | Accession No.  | Photosynthetic type  | Database | Kcat mean | Kcat SD | Sc/o mean | Sc/o SD | Kc <sup>21%O2</sup> mean | Kc <sup>21%O2</sup> SD | Citation                      |
|------------------------------------|----------------|----------------------|----------|-----------|---------|-----------|---------|--------------------------|------------------------|-------------------------------|
| <i>Aegilops biuncialis</i>         | LN626633       | C <sub>3</sub> plant | EMBL     | 3.2       | 0.2     | 96.3      | 4.9     | 16.8                     | 2.9                    | Prins et al. (2016)           |
| <i>Aegilops comosa</i>             | LN626632       | C <sub>3</sub> plant | EMBL     | 2.9       | 0.2     | 106.0     | 4.3     | 13.5                     | 2.1                    | Prins et al. (2016)           |
| <i>Aegilops cylindrica</i>         | LN626627       | C <sub>3</sub> plant | EMBL     | 3.7       | 0.2     | 109.0     | 3.8     | 13.7                     | 2.9                    | Prins et al. (2016)           |
| <i>Aegilops juvenalis</i>          | CEH24677.1     | C <sub>3</sub> plant | NCBI     | 3.3       | 0.2     | 90.4      | 6.4     | 20.6                     | 3.8                    | Prins et al. (2016)           |
| <i>Aegilops speltoides</i>         | LN626629       | C <sub>3</sub> plant | EMBL     | 3.2       | 0.2     | 102.0     | 5.6     | 16.5                     | 3.2                    | Prins et al. (2016)           |
| <i>Aegilops tauschii</i>           | LN626630       | C <sub>3</sub> plant | EMBL     | 2.9       | 0.2     | 107.0     | 8.3     | 14.9                     | 1.8                    | Prins et al. (2016)           |
| <i>Aegilops triuncialis</i>        | LN626634       | C <sub>3</sub> plant | EMBL     | 2.6       | 0.2     | 103.0     | 5.9     | 12.8                     | 2.2                    | Prins et al. (2016)           |
| <i>Aegilops uniaristata</i>        | LN626631       | C <sub>3</sub> plant | EMBL     | 2.7       | 0.2     | 102.0     | 1.1     | 13.8                     | 2.3                    | Prins et al. (2016)           |
| <i>Aegilops vavilovii</i>          | LN626635       | C <sub>3</sub> plant | EMBL     | 3.3       | 0.2     | 109.0     | 3.0     | 13.3                     | 1.9                    | Prins et al. (2016)           |
| <i>Agriophyllum squarrosum</i>     | A0A1C3HPL7     | C <sub>3</sub> plant | uni      | 2.8       | 0.1     | 93.9      | 1.1     | 15.4                     | 1.5                    | Orr et al. (2016)             |
| <i>Agrostis scabra</i>             | A0A1C3HPM5     | C <sub>3</sub> plant | uni      | 3.6       | 0.1     | 103.0     | 1.6     | 22.0                     | 1.7                    | Orr et al. (2016)             |
| <i>Agrostis stolonifera</i>        | ABK79588.1     | C <sub>3</sub> plant | NCBI     | 5.2       | 0.1     | 105.0     | 1.4     | 25.3                     | 1.5                    | Orr et al. (2016)             |
| <i>Amaranthus hybridus</i>         | YP_010028517.1 | C <sub>4</sub> plant | NCBI     | 3.8       | 0.3     | 82.0      | 4.0     | 21.3                     | 1.5                    | Savir et al. (2010)           |
| <i>Amphicarpaea bracteata</i>      | A0A1C3HPM0     | C <sub>3</sub> plant | uni      | 4.0       | 0.1     | 97.5      | 2.2     | 29.0                     | 2.1                    | Orr et al. (2016)             |
| <i>Arabidopsis thaliana</i>        | QDK58872.1     | C <sub>3</sub> plant | NCBI     | 4.1       | 0.3     | 105.0     | 7.3     | 16.1                     | 0.7                    | Galmés et al. (2014b)         |
| <i>Arctagrostis latifolia</i>      | A0A1C3HPM4     | C <sub>3</sub> plant | uni      | 5.8       | 0.1     | 105.0     | 1.4     | 21.0                     | 1.1                    | Orr et al. (2016)             |
| <i>Artemisia myriantha</i>         | A0A1C3HPM2     | C <sub>3</sub> plant | uni      | 3.1       | 0.1     | 110.0     | 1.7     | 26.4                     | 1.3                    | Orr et al. (2016)             |
| <i>Artemisia vulgaris</i>          | LT576797       | C <sub>3</sub> plant | EMBL     | 3.9       | 0.2     | 105.0     | 2.6     | 31.9                     | 4.3                    | Orr et al. (2016)             |
| <i>Avena sativa</i>                | AAA84028.1     | C <sub>3</sub> plant | NCBI     | 2.3       | 0.3     | 99.9      | 3.0     | 18.1                     | 2.0                    | Hermida-Carrera et al. (2016) |
| <i>Beta maritima ssp. maritima</i> | AEK33913.1     | C <sub>3</sub> plant | NCBI     |           |         | 92.9      | 3.2     |                          |                        | Galmes et al. (2005)          |
| <i>Beta vulgaris</i>               | AAY68360.1     | C <sub>3</sub> plant | NCBI     | 2.0       | 0.3     | 101.0     | 2.0     | 18.6                     | 1.1                    | Hermida-Carrera et al. (2016) |
| <i>Brachypodium distachyon</i>     | LN626640       | C <sub>3</sub> plant | EMBL     | 2.1       | 0.1     | 111.0     | 4.0     | 11.9                     | 2.5                    | Prins et al. (2016)           |
| <i>Brassica oleracea</i>           | YP_009564583.1 | C <sub>3</sub> plant | NCBI     | 2.1       | 0.3     | 96.2      | 1.3     | 19.2                     | 0.3                    | Hermida-Carrera et al. (2016) |
| <i>Bromus anomalus</i>             | A0A1C3HPM1     | C <sub>3</sub> plant | uni      | 2.9       | 0.2     | 101.0     | 3.2     | 16.9                     | 3.1                    | Orr et al. (2016)             |

|                                                          |                |                      |      |     |     |       |     |      |     |                               |
|----------------------------------------------------------|----------------|----------------------|------|-----|-----|-------|-----|------|-----|-------------------------------|
| <i>Calamagrostis arundinacea</i>                         | A0A1C3HPL9     | C <sub>3</sub> plant | uni  | 4.1 | 0.1 | 104.0 | 1.6 | 22.7 | 1.3 | Orr et al. (2016)             |
| <i>Calamagrostis canescens</i>                           | A0A1C3HPN2     | C <sub>3</sub> plant | uni  | 2.5 | 0.1 | 98.5  | 2.6 | 15.2 | 2.2 | Orr et al. (2016)             |
| <i>Calamagrostis foliosa</i>                             | A0A1C3HPN4     | C <sub>3</sub> plant | uni  | 3.5 | 0.1 | 105.0 | 1.4 | 20.9 | 1.1 | Orr et al. (2016)             |
| <i>Calamagrostis inexpansa</i>                           | A0A1C3HPM7     | C <sub>3</sub> plant | uni  | 3.3 | 0.1 | 111.0 | 1.3 | 18.8 | 1.7 | Orr et al. (2016)             |
| <i>Calamagrostis nutkaensis</i>                          | A0A1C3HPN0     | C <sub>3</sub> plant | uni  | 3.1 | 0.1 | 109.0 | 1.2 | 20.1 | 2.8 | Orr et al. (2016)             |
| <i>Capsicum annuum</i>                                   | A0A1U8QD66     | C <sub>3</sub> plant | uni  | 1.9 | 0.1 | 96.0  | 4.5 | 19.8 | 1.5 | Hermida-Carrera et al. (2016) |
| <i>Cenchrus ciliaris</i>                                 | YP_009573569.1 | C <sub>4</sub> plant | NCBI | 6.0 | 0.8 | 69.9  | 3.0 | 29.2 | 2.3 | Sharwood et al. (2016)        |
| <i>Chenopodium album</i>                                 | ATL76552.1     | C <sub>3</sub> plant | NCBI | 2.9 | 0.1 | 78.7  | 1.0 | 11.2 | 2.8 | Kubien et al. (2008)          |
| <i>Chenopodium murale</i>                                | SBO07486.1     | C <sub>3</sub> plant | NCBI | 4.4 | 0.2 | 109.0 | 0.8 | 23.8 | 3.1 | Orr et al. (2016)             |
| <i>Chenopodium rubrum</i>                                | A0A1C3HPN3     | C <sub>3</sub> plant | uni  | 4.1 | 0.1 | 97.8  | 1.0 | 14.5 | 1.3 | Orr et al. (2016)             |
| <i>Chrysanthellum indicum</i> var. <i>afroamericanum</i> | A0A1C3HPM6     | C <sub>4</sub> plant | uni  | 4.7 | 0.1 | 82.4  | 0.6 | 28.1 | 2.3 | Orr et al. (2016)             |
| <i>Citrullus ecirrhosus</i>                              | A0A1C3HPM8     | C <sub>3</sub> plant | uni  | 3.1 | 0.2 | 99.9  | 1.5 | 18.9 | 3.0 | Orr et al. (2016)             |
| <i>Citrullus lanatus</i> var. <i>lanatus</i>             | SBO07491.1     | C <sub>3</sub> plant | NCBI | 2.5 | 0.1 | 107.0 | 2.4 | 19.4 | 1.2 | Orr et al. (2016)             |
| <i>Coffea arabica</i>                                    | YP_817490.1    | C <sub>3</sub> plant | NCBI | 2.1 | 0.2 | 98.7  | 3.8 | 22.9 | 2.4 | Hermida-Carrera et al. (2016) |
| <i>Crithmum maritimum</i>                                | YP_004733335.1 | C <sub>3</sub> plant | NCBI | 3.4 | 0.1 |       |     | 18.7 | 0.2 | Galmés et al. (2014b)         |
| <i>Cucurbita maxima</i>                                  | YP_009447458.1 | C <sub>3</sub> plant | NCBI | 2.2 | 0.2 | 98.4  | 0.4 | 19.2 | 1.0 | Hermida-Carrera et al. (2016) |
| <i>Cynodon dactylon</i>                                  | QYC94651.1     | C <sub>4</sub> plant | NCBI |     |     | 89.2  | 9.0 | 32.0 | 2.0 | Carmo-Silva et al. (2010)     |
| <i>Dactylis glomerata</i> cv. <i>Porto</i>               | AJV89540.1     | C <sub>3</sub> plant | NCBI | 3.2 | 0.2 |       |     | 15.7 | 0.1 | Galmés et al. (2014b)         |
| <i>Deschampsia danthonioides</i>                         | A0A1C3HPP5     | C <sub>3</sub> plant | uni  | 4.5 | 0.1 | 108.0 | 1.6 | 22.3 | 1.4 | Orr et al. (2016)             |
| <i>Desmodium cinereum</i>                                | A0A1C3HPP3     | C <sub>3</sub> plant | uni  | 3.0 | 0.1 | 97.5  | 2.0 | 12.8 | 1.0 | Orr et al. (2016)             |
| <i>Desmodium intortum</i>                                | A0A1C3HPN7     | C <sub>3</sub> plant | uni  | 3.3 | 0.1 | 98.7  | 1.9 | 14.2 | 1.7 | Orr et al. (2016)             |
| <i>Desmodium psilocarpum</i>                             | A0A1C3HPP4     | C <sub>3</sub> plant | uni  | 3.6 | 0.1 | 95.9  | 1.7 | 15.6 | 0.9 | Orr et al. (2016)             |
| <i>Echinochloa crus-galli</i>                            | QPB15306.1     | C <sub>4</sub> plant | NCBI |     |     | 83.0  | 3.0 |      |     | Jordan and Ogren (1983)       |

|                                 |                |                                      |      |     |     |       |      |      |     |                               |
|---------------------------------|----------------|--------------------------------------|------|-----|-----|-------|------|------|-----|-------------------------------|
| <i>Elymus farctus</i>           | A0A1C3HPN9     | C <sub>3</sub> plant                 | uni  | 3.3 | 0.1 | 106.0 | 1.3  | 19.5 | 2.7 | Orr et al. (2016)             |
| <i>Eragrostis tef</i>           | A0A6C0SV93     | C <sub>4</sub> plant                 | uni  | 7.1 | 0.2 | 89.0  | 2.1  | 34.9 | 2.1 | Orr et al. (2016)             |
| <i>Erythrina flabelliformis</i> | A0A1C3HPP1     | C <sub>3</sub> plant                 | uni  | 3.6 | 0.1 | 96.4  | 1.9  | 18.4 | 1.9 | Orr et al. (2016)             |
| <i>Espeletia schultzei</i>      | AIL52300.1     | C <sub>3</sub> plant                 | NCBI |     |     |       |      | 21.7 | 2.0 | Castrillo (1995)              |
| <i>Euphorbia helioscopia</i>    | A0A6M4AEZ2     | C <sub>3</sub> plant                 | uni  | 1.9 | 0.1 | 96.8  | 1.9  | 11.5 | 1.7 | Orr et al. (2016)             |
| <i>Euphorbia microsphaera</i>   | A0A1C3HPP0     | C <sub>3</sub> plant                 | uni  | 4.5 | 0.2 | 99.7  | 0.7  | 25.8 | 2.7 | Orr et al. (2016)             |
| <i>Festuca gigantea</i>         | A0A1C3HPN8     | C <sub>3</sub> plant                 | uni  | 5.1 | 0.1 | 108.0 | 2.4  | 31.2 | 1.6 | Orr et al. (2016)             |
| <i>Festuca pratensis</i>        | K4PCJ4         | C <sub>3</sub> plant                 | uni  | 5.1 | 0.2 | 106.0 | 1.1  | 23.1 | 2.5 | Orr et al. (2016)             |
| <i>Flaveria angustifolia</i>    | ADW80651.1     | C <sub>3</sub> -C <sub>4</sub> plant | NCBI | 2.9 | 0.2 | 83.2  | 1.0  | 13.1 | 0.1 | Kubien et al. (2008)          |
| <i>Flaveria anomala</i>         | ADW80650.1     | C <sub>3</sub> -C <sub>4</sub> plant | NCBI | 3.8 | 0.2 | 77.9  | 0.9  | 10.7 | 0.6 | Kubien et al. (2008)          |
| <i>Flaveria australasica</i>    | P19161.1       | C <sub>4</sub> plant                 | NCBI | 3.8 | 0.0 | 77.2  | 0.3  | 22.0 | 4.7 | Kubien et al. (2008)          |
| <i>Flaveria bidentis</i>        | P19161.1       | C <sub>4</sub> plant                 | NCBI | 4.2 | 0.3 | 75.5  | 0.8  | 20.2 | 1.6 | Kubien et al. (2008)          |
| <i>Flaveria chloraefolia</i>    | ADW80653.1     | C <sub>3</sub> -C <sub>4</sub> plant | NCBI | 3.4 | 0.1 | 81.6  | 1.3  | 12.4 | 2.3 | Kubien et al. (2008)          |
| <i>Flaveria cronquistii</i>     | ADW80654.1     | C <sub>3</sub> plant                 | NCBI | 3.1 | 0.3 | 81.0  | 2.0  | 10.8 | 0.4 | Kubien et al. (2008)          |
| <i>Flaveria floridana</i>       | ADW80655.1     | C <sub>3</sub> -C <sub>4</sub> plant | NCBI | 3.2 | 0.1 | 84.5  | 1.1  | 13.2 | 0.4 | Kubien et al. (2008)          |
| <i>Flaveria kochiana</i>        | ADW80656.1     | C <sub>4</sub> plant                 | NCBI | 3.7 | 0.1 | 77.0  | 1.2  | 22.7 | 2.7 | Kubien et al. (2008)          |
| <i>Flaveria linearis</i>        | ADW80657.1     | C <sub>3</sub> -C <sub>4</sub> plant | NCBI | 3.4 | 0.1 | 78.1  | 1.3  | 12.5 | 0.9 | Kubien et al. (2008)          |
| <i>Flaveria palmeri</i>         | ADW80658.1     | C <sub>4</sub> plant                 | NCBI | 3.5 | 0.2 | 83.8  | 1.0  | 13.5 | 0.9 | Kubien et al. (2008)          |
| <i>Flaveria pringlei</i>        | ADW80648.1     | C <sub>3</sub> plant                 | NCBI | 3.1 | 0.2 | 80.8  | 1.2  | 12.0 | 2.1 | Kubien et al. (2008)          |
| <i>Flaveria ramosissima</i>     | ADW80659.1     | C <sub>3</sub> -C <sub>4</sub> plant | NCBI | 2.8 | 0.1 | 79.8  | 1.1  | 12.0 | 0.2 | Kubien et al. (2008)          |
| <i>Flaveria sonorensis</i>      | ADW80660.1     | C <sub>3</sub> -C <sub>4</sub> plant | NCBI | 2.7 | 0.1 | 84.3  | 1.4  | 10.2 | 1.4 | Kubien et al. (2008)          |
| <i>Flaveria trinervia</i>       | ADW80661.1     | C <sub>4</sub> plant                 | NCBI | 4.4 | 0.2 | 77.0  | 0.8  | 17.9 | 1.8 | Kubien et al. (2008)          |
| <i>Flaveria vaginata</i>        | ADW80662.1     | C <sub>4</sub> plant                 | NCBI | 3.8 | 0.5 | 78.7  | 1.5  | 21.4 | 1.9 | Kubien et al. (2008)          |
| <i>Flueggea suffruticosa</i>    | AFU96118.1     | C <sub>3</sub> plant                 | NCBI | 3.4 | 0.1 | 101.0 | 1.5  | 19.2 | 1.5 | Orr et al. (2016)             |
| <i>Foeniculum vulgare</i>       | AMD83923.1     | C <sub>3</sub> plant                 | NCBI | 4.4 | 0.2 | 94.3  | 2.7  | 20.7 | 2.7 | Orr et al. (2016)             |
| <i>Glycine canescens</i>        | YP_008145856.1 | C <sub>3</sub> plant                 | NCBI | 2.6 | 0.0 | 97.1  | 1.7  | 17.2 | 0.9 | Orr et al. (2016)             |
| <i>Glycine max</i>              | ABC25107.1     | C <sub>3</sub> plant                 | NCBI | 1.5 | 0.1 | 97.0  | 1.1  | 16.2 | 0.7 | Hermida-Carrera et al. (2016) |
| <i>Helianthus annuus L.</i>     | XP_035835866.1 | C <sub>3</sub> plant                 | NCBI |     |     | 73.6  | 18.3 |      |     | Viil et al. (2012)            |
| <i>Hordeum brachyantherum</i>   | A0A1C3HPQ0     | C <sub>3</sub> plant                 | uni  | 2.9 | 0.1 | 101.0 | 2.0  | 16.2 | 1.5 | Orr et al. (2016)             |
| <i>Hordeum murinum</i>          | A0A1C3HPQ4     | C <sub>3</sub> plant                 | uni  | 4.2 | 0.1 | 100.0 | 1.1  | 21.5 | 1.1 | Orr et al. (2016)             |

|                                               |                |                      |      |     |     |       |     |      |     |                               |
|-----------------------------------------------|----------------|----------------------|------|-----|-----|-------|-----|------|-----|-------------------------------|
| <i>Hordeum vulgare ssp. vulgare cv. Morex</i> | ASD42799.1     | C <sub>3</sub> plant | NCBI |     |     |       |     | 14.9 | 1.6 | Hermida-Carrera et al. (2016) |
| <i>Ipomoea batatas</i>                        | AFU50388.1     | C <sub>3</sub> plant | NCBI | 2.5 | 0.1 | 98.5  | 6.6 | 21.1 | 1.0 | Hermida-Carrera et al. (2016) |
| <i>Iris douglasiana</i>                       | BAO57024.1     | C <sub>3</sub> plant | NCBI | 3.5 | 0.2 |       |     | 14.6 | 0.9 | Galmés et al. (2014b)         |
| <i>Lablab purpureus</i>                       | YP_010046451.1 | C <sub>3</sub> plant | NCBI | 5.3 | 0.1 | 91.1  | 1.7 | 21.7 | 1.6 | Orr et al. (2016)             |
| <i>Lactuca sativa</i>                         | YP_398337.1    | C <sub>3</sub> plant | NCBI |     |     | 94.0  | 1.9 | 18.2 | 1.4 | Hermida-Carrera et al. (2016) |
| <i>Lepidium campestre</i>                     | A0A1C3HPQ1     | C <sub>3</sub> plant | uni  | 3.4 | 0.1 | 92.8  | 1.2 | 15.8 | 1.0 | Orr et al. (2016)             |
| <i>Limonium antonii-llorensii</i>             | AID50137.1     | C <sub>3</sub> plant | NCBI | 2.4 | 0.1 | 112.0 | 1.8 | 13.3 | 0.5 | Galmés et al. (2014a)         |
| <i>Limonium artruchium</i>                    | AID50126.1     | C <sub>3</sub> plant | NCBI | 3.0 | 0.1 | 113.0 | 2.0 | 15.5 | 0.5 | Galmés et al. (2014a)         |
| <i>Limonium balearicum</i>                    | AID50147.1     | C <sub>3</sub> plant | NCBI | 3.6 | 0.1 | 103.0 | 1.5 | 15.6 | 0.8 | Galmés et al. (2014a)         |
| <i>Limonium barceloi</i>                      | AID50128.1     | C <sub>3</sub> plant | NCBI | 3.4 | 0.1 | 106.0 | 2.0 | 14.9 | 1.0 | Galmés et al. (2014a)         |
| <i>Limonium biflorum</i>                      | AID50121.1     | C <sub>3</sub> plant | NCBI | 2.4 | 0.1 | 112.0 | 1.8 | 13.3 | 0.5 | Galmés et al. (2014a)         |
| <i>Limonium companyonis</i>                   | AID50113.1     | C <sub>3</sub> plant | NCBI | 3.3 | 0.2 | 112.0 | 2.1 | 13.3 | 0.4 | Galmés et al. (2014a)         |
| <i>Limonium echioides</i>                     | AID50149.1     | C <sub>3</sub> plant | NCBI | 3.9 | 0.1 | 106.0 | 1.8 | 16.0 | 0.3 | Galmés et al. (2014a)         |
| <i>Limonium ejulabilis</i>                    | AID50114.1     | C <sub>3</sub> plant | NCBI | 2.0 | 0.2 | 116.0 | 3.2 | 11.4 | 0.3 | Galmés et al. (2014a)         |
| <i>Limonium gibertii</i>                      | AID50136.1     | C <sub>3</sub> plant | NCBI | 2.5 | 0.1 | 112.0 | 2.5 | 13.5 | 1.0 | Galmés et al. (2014a)         |
| <i>Limonium grosii</i>                        | AID50112.1     | C <sub>3</sub> plant | NCBI | 2.9 | 0.1 | 113.0 | 3.3 | 13.3 | 0.7 | Galmés et al. (2014a)         |
| <i>Limonium gymnesicum</i>                    | AID50143.1     | C <sub>3</sub> plant | NCBI | 2.4 | 0.1 | 121.0 | 2.3 | 12.6 | 0.2 | Galmés et al. (2014a)         |
| <i>Limonium latebracteatum</i>                | BAO57039.1     | C <sub>3</sub> plant | NCBI | 2.7 | 0.1 |       |     | 14.2 | 1.6 | Galmés et al. (2014b)         |
| <i>Limonium leonardi-llorensii</i>            | AID50109.1     | C <sub>3</sub> plant | NCBI | 2.8 | 0.1 | 110.0 | 1.1 | 13.0 | 0.6 | Galmés et al. (2014a)         |
| <i>Limonium magallufianum</i>                 | AID50120.1     | C <sub>3</sub> plant | NCBI | 2.6 | 0.1 | 111.0 | 2.9 | 11.9 | 0.5 | Galmés et al. (2014a)         |
| <i>Limonium retusum</i>                       | AID50105.1     | C <sub>3</sub> plant | NCBI | 2.1 | 0.1 | 121.0 | 1.4 | 10.9 | 0.6 | Galmés et al. (2014a)         |
| <i>Limonium stenophyllum</i>                  | BAO57038.1     | C <sub>3</sub> plant | NCBI | 2.6 | 0.1 |       |     | 12.3 | 0.3 | Galmés et al. (2014b)         |
| <i>Limonium virgatum</i>                      | AID50151.1     | C <sub>3</sub> plant | NCBI | 2.4 | 0.1 |       |     | 13.2 | 0.3 | Galmés et al. (2014b)         |
| <i>Lolium multiflorum</i>                     | AFV62913.1     | C <sub>3</sub> plant | NCBI | 4.5 | 0.1 | 99.9  | 1.8 | 29.1 | 2.1 | Orr et al. (2016)             |
| <i>Lolium perenne</i>                         | CAO85984.1     | C <sub>3</sub> plant | NCBI |     |     | 80.0  | 1.0 | 22.7 | 1.1 | Savir et al. (2010)           |
| <i>Lolium rigidum</i>                         | A0A1C3HPR5     | C <sub>3</sub> plant | uni  | 4.7 | 0.1 | 100.0 | 1.4 | 25.0 | 1.7 | Orr et al. (2016)             |

|                                     |                |                      |      |     |     |       |     |      |     |                               |
|-------------------------------------|----------------|----------------------|------|-----|-----|-------|-----|------|-----|-------------------------------|
| <i>Macrotyloma uniflorum</i>        | ACJ38561.1     | C <sub>3</sub> plant | NCBI | 4.4 | 0.2 | 101.0 | 2.4 | 25.2 | 3.3 | Orr et al. (2016)             |
| <i>Manihot esculenta</i>            | QFO47553.1     | C <sub>3</sub> plant | NCBI | 1.4 | 0.1 | 101.0 | 0.9 | 10.8 | 0.6 | Hermida-Carrera et al. (2016) |
| <i>Medicago sativa</i>              | AOA1B3T043     | C <sub>3</sub> plant | uni  | 1.7 | 0.1 | 95.6  | 2.2 | 16.4 | 1.9 | Hermida-Carrera et al. (2016) |
| <i>Megathyrsus maximus</i>          | YP_009260243.1 | C <sub>4</sub> plant | NCBI | 5.3 | 0.5 | 80.3  | 2.8 | 27.1 | 1.1 | Sharwood et al. (2016)        |
| <i>Mentha aquatica</i>              | ADU79049.1     | C <sub>3</sub> plant | NCBI |     |     | 97.2  | 3.3 |      |     | Galmes et al. (2005)          |
| <i>Mercurialis annua</i>            | AOA1C3HPR2     | C <sub>3</sub> plant | uni  | 3.4 | 0.2 | 95.7  | 2.7 | 17.0 | 3.7 | Orr et al. (2016)             |
| <i>Musa velutina</i>                | UCC34423.1     | C <sub>3</sub> plant | NCBI | 3.2 | 0.1 | 111.0 | 1.8 | 19.0 | 1.9 | Orr et al. (2016)             |
| <i>Nicotiana tabacum</i>            | 1RLC_L         | C <sub>3</sub> plant | NCBI | 3.1 | 0.3 | 80.0  | 2.6 | 18.3 | 0.1 | Long et al. (2018)            |
| <i>Oryza barthii/glaberrima</i>     | LT576837       | C <sub>3</sub> plant | EMBL | 2.5 | 0.0 | 107.0 | 1.5 | 14.0 | 0.8 | Orr et al. (2016)             |
| <i>Oryza eichingeri</i>             | LT576838       | C <sub>3</sub> plant | EMBL | 2.5 | 0.1 | 107.0 | 1.2 | 14.1 | 1.5 | Orr et al. (2016)             |
| <i>Oryza glaberrima (WAB 1939)</i>  | LT576839       | C <sub>3</sub> plant | EMBL | 2.7 | 0.0 | 105.0 | 1.1 | 14.9 | 0.6 | Orr et al. (2016)             |
| <i>Oryza glumaepatula</i>           | LT576840       | C <sub>3</sub> plant | EMBL | 2.4 | 0.1 | 109.0 | 0.7 | 15.2 | 1.5 | Orr et al. (2016)             |
| <i>Oryza longistaminata</i>         | LT576841       | C <sub>3</sub> plant | EMBL | 2.2 | 0.0 | 108.0 | 1.3 | 15.1 | 1.1 | Orr et al. (2016)             |
| <i>Oryza meridionalis</i>           | LT576842       | C <sub>3</sub> plant | EMBL | 2.6 | 0.0 | 107.0 | 1.3 | 14.6 | 0.9 | Orr et al. (2016)             |
| <i>Oryza nivara</i>                 | LT576843       | C <sub>3</sub> plant | EMBL | 2.7 | 0.0 | 107.0 | 0.6 | 15.6 | 1.0 | Orr et al. (2016)             |
| <i>Oryza punctata</i>               | LT576844       | C <sub>3</sub> plant | EMBL | 2.7 | 0.1 | 109.0 | 1.2 | 14.9 | 2.2 | Orr et al. (2016)             |
| <i>Oryza sativa</i>                 | ANG44656.1     | C <sub>3</sub> plant | NCBI | 2.1 | 0.3 | 93.1  | 1.2 | 17.3 | 2.4 | Hermida-Carrera et al. (2016) |
| <i>Oryza sativa subsp. Indica</i>   | LT576845       | C <sub>3</sub> plant | EMBL | 2.2 | 0.1 | 101.0 | 2.0 | 7.0  | 1.6 | Orr et al. (2016)             |
| <i>Oryza sativa subsp. Japonica</i> | LT576846       | C <sub>3</sub> plant | EMBL | 2.8 | 0.1 | 106.0 | 1.4 | 11.8 | 1.8 | Orr et al. (2016)             |
| <i>Pallenis maritima</i>            | BAO57025.1     | C <sub>3</sub> plant | NCBI | 2.7 | 0.1 |       |     | 10.6 | 0.5 | Galmés et al. (2014b)         |
| <i>Panicum amarum</i>               | LT576849       | C <sub>4</sub> plant | EMBL | 3.2 | 0.1 | 89.5  | 3.0 | 33.1 | 3.9 | Orr et al. (2016)             |
| <i>Panicum antidotale</i>           | SCM15150.1     | C <sub>4</sub> plant | NCBI | 3.9 | 0.2 | 74.5  | 0.4 |      |     | Sharwood et al. (2016)        |
| <i>Panicum bisulcatum</i>           | SCM15147.1     | C <sub>3</sub> plant | NCBI | 2.6 | 0.4 | 87.7  | 1.5 | 12.6 | 1.0 | Sharwood et al. (2016)        |
| <i>Panicum coloratum</i>            | SCM15156.1     | C <sub>4</sub> plant | NCBI | 3.4 | 0.6 | 84.8  | 2.8 | 17.3 | 1.7 | Sharwood et al. (2016)        |
| <i>Panicum deustum</i>              | SCM15159.1     | C <sub>4</sub> plant | NCBI | 5.0 | 0.5 | 84.8  | 0.2 | 28.1 | 2.0 | Sharwood et al. (2016)        |
| <i>Panicum dichotomiflorum</i>      | LT576847       | C <sub>4</sub> plant | EMBL | 3.1 | 0.1 | 92.6  | 1.8 | 36.3 | 2.9 | Orr et al. (2016)             |

|                                         |                |                      |      |     |     |       |      |      |     |                               |
|-----------------------------------------|----------------|----------------------|------|-----|-----|-------|------|------|-----|-------------------------------|
| <i>Panicum milioides</i>                | SCM15149.1     | C <sub>3</sub> plant | NCBI | 2.2 | 0.3 | 92.3  | 1.0  | 12.1 | 0.8 | Sharwood et al. (2016)        |
| <i>Panicum milliaceum</i>               | SCM15155.1     | C <sub>4</sub> plant | NCBI |     |     | 79.9  | 4.3  | 13.1 | 1.1 | Sharwood et al. (2016)        |
| <i>Panicum monticola</i>                | SCM15151.1     | C <sub>4</sub> plant | NCBI | 5.3 | 0.7 | 79.4  | 1.7  | 26.6 | 4.0 | Sharwood et al. (2016)        |
| <i>Panicum phragmitoides</i>            | LT576848       | C <sub>4</sub> plant | EMBL | 2.8 | 0.3 | 107.0 | 1.3  | 25.1 | 7.5 | Orr et al. (2016)             |
| <i>Panicum virgatum</i>                 | SCM15154.1     | C <sub>4</sub> plant | NCBI | 3.3 | 0.9 | 82.6  | 2.8  | 24.5 | 2.1 | Sharwood et al. (2016)        |
| <i>Paspalum dilatatum</i>               | YP_009267237.1 | C <sub>4</sub> plant | NCBI |     |     | 88.0  | 7.1  | 30.0 | 1.2 | Carmo-Silva et al. (2010)     |
| <i>Petroselinum crispum</i>             | YP_004733851.1 | C <sub>3</sub> plant | NCBI |     |     | 77.0  | 2.0  |      |     | Jordan and Ogren (1983)       |
| <i>Phaseolus carteri</i>                | LT576850       | C <sub>3</sub> plant | EMBL | 3.2 | 0.1 | 84.5  | 2.1  | 14.2 | 1.9 | Orr et al. (2016)             |
| <i>Phaseolus coccineus</i>              | LT576851       | C <sub>3</sub> plant | EMBL | 3.9 | 0.2 | 104.0 | 2.9  | 15.6 | 2.6 | Orr et al. (2016)             |
| <i>Phaseolus lunatus</i>                | LT576852       | C <sub>3</sub> plant | EMBL | 3.2 | 0.1 | 101.0 | 0.7  | 17.3 | 1.1 | Orr et al. (2016)             |
| <i>Phaseolus vulgaris</i>               | QCQ20610.1     | C <sub>3</sub> plant | NCBI | 1.7 | 0.2 | 99.7  | 2.7  | 14.0 | 1.0 | Hermida-Carrera et al. (2016) |
| <i>Pisum sativum</i>                    | AIK21409.1     | C <sub>3</sub> plant | NCBI |     |     | 90.2  | 1.7  |      |     | Uemura et al. (1997)          |
| <i>Plantago lanceolata L.</i>           | AAA84554.1     | C <sub>3</sub> plant | NCBI |     |     | 77.3  | 12.9 |      |     | Viil et al. (2012)            |
| <i>Poa palustris</i>                    | LT576854       | C <sub>3</sub> plant | EMBL | 4.2 | 0.1 | 112.0 | 2.1  | 19.2 | 1.3 | Orr et al. (2016)             |
| <i>Portulaca oleracea</i>               | AFB70630.1     | C <sub>4</sub> plant | NCBI | 5.9 | 0.4 | 78.0  | 4.0  |      |     | Savir et al. (2010)           |
| <i>Puccinellia distans</i>              | LT576855       | C <sub>3</sub> plant | EMBL | 5.4 | 0.2 | 104.0 | 1.9  | 22.2 | 2.4 | Orr et al. (2016)             |
| <i>Puccinellia lemmonii</i>             | LT576856       | C <sub>3</sub> plant | EMBL | 5.2 | 0.4 | 102.0 | 1.0  | 28.1 | 5.9 | Orr et al. (2016)             |
| <i>Puccinellia maritima</i>             | LT576857       | C <sub>3</sub> plant | EMBL | 5.4 | 0.2 | 106.0 | 1.9  | 20.8 | 2.4 | Orr et al. (2016)             |
| <i>Puccinellia nuttalliana</i>          | LT576858       | C <sub>3</sub> plant | EMBL | 4.0 | 0.1 | 105.0 | 1.1  | 25.2 | 1.8 | Orr et al. (2016)             |
| <i>Pueraria montana</i>                 | QRM91166.1     | C <sub>3</sub> plant | NCBI | 2.7 | 0.1 | 101.0 | 1.0  | 20.9 | 1.6 | Orr et al. (2016)             |
| <i>Saccharum officinarum</i>            | ASV52260.1     | C <sub>4</sub> plant | NCBI | 3.9 | 0.3 | 82.2  | 1.8  | 31.7 | 2.1 | Hermida-Carrera et al. (2016) |
| <i>Secale cereale</i>                   | LN626639       | C <sub>3</sub> plant | EMBL | 3.2 | 0.2 | 91.5  | 4.1  | 20.2 | 2.1 | Prins et al. (2016)           |
| <i>Setaria italica</i>                  | AGZ13153.1     | C <sub>4</sub> plant | NCBI |     |     | 58.0  | 2.0  |      |     | Jordan and Ogren (1983)       |
| <i>Setaria viridis</i>                  | AGT56139.1     | C <sub>4</sub> plant | NCBI | 5.9 | 0.5 | 72.7  | 0.2  | 25.5 | 2.0 | Sharwood et al. (2016)        |
| <i>Sideritis cretica subsp. spicata</i> | BAO57028.1     | C <sub>3</sub> plant | NCBI | 2.0 | 0.3 |       |      | 12.8 | 0.2 | Galmés et al. (2014b)         |
| <i>Solanum lycopersicum</i>             | ANW81480.1     | C <sub>3</sub> plant | NCBI | 2.3 | 0.2 | 92.4  | 2.3  | 16.6 | 1.4 | Hermida-Carrera et al. (2016) |
| <i>Solanum tuberosum</i>                | ABD47065.1     | C <sub>3</sub> plant | NCBI | 2.0 | 0.3 | 95.4  | 2.3  | 18.0 | 0.8 | Hermida-Carrera et al. (2016) |
| <i>Sorghum bicolor</i>                  | YP_899415.1    | C <sub>4</sub> plant | NCBI | 5.4 | 0.1 | 70.0  | 1.0  |      |     | Savir et al. (2010)           |



|                                 |                |                      |      |     |     |       |     |      |     |                               |
|---------------------------------|----------------|----------------------|------|-----|-----|-------|-----|------|-----|-------------------------------|
| <i>Sphenostylis stenocarpa</i>  | LT576860       | C <sub>3</sub> plant | EMBL | 2.8 | 0.1 | 93.6  | 3.4 | 17.4 | 1.5 | Orr et al. (2016)             |
| <i>Spinacia oleracea</i>        | CAA23473.1     | C <sub>3</sub> plant | NCBI | 2.4 | 0.1 | 97.0  | 1.2 | 26.9 | 0.8 | Hermida-Carrera et al. (2016) |
| <i>Steinchisma laxa</i>         | YP_009261073.1 | C <sub>3</sub> plant | NCBI | 2.3 | 0.3 | 91.4  | 4.8 |      |     | Sharwood et al. (2016)        |
| <i>Tephrosia candida</i>        | LT576861       | C <sub>3</sub> plant | EMBL | 2.2 | 0.2 | 97.8  | 2.5 | 15.9 | 3.8 | Orr et al. (2016)             |
| <i>Tephrosia purpurea</i>       | LT576862       | C <sub>3</sub> plant | EMBL | 2.2 | 0.1 | 103.0 | 1.1 | 12.4 | 1.4 | Orr et al. (2016)             |
| <i>Tephrosia rhodesica</i>      | LT576863       | C <sub>3</sub> plant | EMBL | 2.2 | 0.1 | 91.6  | 3.3 | 13.7 | 1.2 | Orr et al. (2016)             |
| <i>Tetragonia expansa</i>       | YP_009462736.1 | C <sub>3</sub> plant | NCBI |     |     | 81.0  | 1.0 | 17.6 | 1.2 | Savir et al. (2010)           |
| <i>Teucrium heterophyllum</i>   | BAO57027.1     | C <sub>3</sub> plant | NCBI | 2.7 | 0.1 |       |     | 10.6 | 0.2 | Galmés et al. (2014b)         |
| <i>Trachycarpus fortunei</i>    | YP_010010626.1 | C <sub>3</sub> plant | NCBI | 2.8 | 0.1 |       |     | 14.2 | 1.3 | Galmés et al. (2014b)         |
| <i>Trifolium repens</i>         | QGV12450.1     | C <sub>3</sub> plant | NCBI |     |     |       |     | 20.8 | 1.2 | Lehnher et al. (1985)         |
| <i>Triticale</i>                | LN626638       | C <sub>3</sub> plant | EMBL | 3.6 | 0.2 | 99.7  | 5.1 | 16.1 | 2.4 | Prins et al. (2016)           |
| <i>Triticum aestivum</i>        | BCU02136.1     | C <sub>3</sub> plant | NCBI | 2.2 | 0.2 | 100.0 | 1.8 | 16.0 | 0.6 | Hermida-Carrera et al. (2016) |
| <i>Triticum aestivum SATYN1</i> | LN626617       | C <sub>3</sub> plant | EMBL | 3.3 | 0.2 | 93.8  | 3.2 | 17.6 | 2.5 | Prins et al. (2016)           |
| <i>Triticum aestivum SATYN2</i> | LN626618       | C <sub>3</sub> plant | EMBL | 3.3 | 0.2 | 96.2  | 3.8 | 17.9 | 2.8 | Prins et al. (2016)           |
| <i>Triticum aestivum SATYN3</i> | LN626619       | C <sub>3</sub> plant | EMBL | 3.6 | 0.2 | 92.9  | 5.9 | 15.7 | 2.2 | Prins et al. (2016)           |
| <i>Triticum dicoccon1</i>       | LN626623       | C <sub>3</sub> plant | EMBL | 3.6 | 0.2 | 94.1  | 3.8 | 15.4 | 2.1 | Prins et al. (2016)           |
| <i>Triticum dicoccon2</i>       | LN626624       | C <sub>3</sub> plant | EMBL | 3.6 | 0.2 | 90.9  | 1.7 | 13.5 | 2.3 | Prins et al. (2016)           |
| <i>Triticum dicoccon3</i>       | LN626625       | C <sub>3</sub> plant | EMBL | 3.4 | 0.2 | 95.2  | 4.2 | 16.8 | 2.5 | Prins et al. (2016)           |
| <i>Triticum dicoccon4</i>       | LN626626       | C <sub>3</sub> plant | EMBL | 3.6 | 0.2 | 93.8  | 3.2 | 18.6 | 2.7 | Prins et al. (2016)           |
| <i>Triticum monococcum</i>      | LN626620       | C <sub>3</sub> plant | EMBL | 3.2 | 0.2 | 104.0 | 4.1 | 14.0 | 2.1 | Prins et al. (2016)           |
| <i>Triticum timonovum</i>       | LN626622       | C <sub>3</sub> plant | EMBL | 3.5 | 0.2 | 101.0 | 3.2 | 16.8 | 3.3 | Prins et al. (2016)           |
| <i>Triticum timopheevii</i>     | LN626621       | C <sub>3</sub> plant | EMBL | 3.4 | 0.2 | 102.0 | 2.8 | 16.2 | 2.3 | Prins et al. (2016)           |
| <i>Urochloa mosambicensis</i>   | SCM15160.1     | C <sub>4</sub> plant | NCBI | 5.7 | 0.7 | 82.5  | 1.3 |      |     | Sharwood et al. (2016)        |
| <i>Urochloa panicoides</i>      | SCM15158.1     | C <sub>4</sub> plant | NCBI | 5.6 | 0.6 | 78.3  | 0.3 | 24.1 | 1.0 | Sharwood et al. (2016)        |
| <i>Zea mays cv. Carella</i>     | CAA78027.1     | C <sub>4</sub> plant | NCBI | 4.1 | 0.6 | 87.3  | 1.4 | 42.0 | 2.8 | Hermida-Carrera et al. (2016) |
| <i>Zostera japonica</i>         | BAD05105.1     | C <sub>4</sub> plant | NCBI |     |     | 84.1  | 7.7 | 28.1 | 1.8 | Carmo-Silva et al. (2010)     |

- Carmo-Silva, A. E., Keys, A. J., Andralojc, P. J., Powers, S. J., Arrabaça, M. C. & Parry, M. A. 2010. Rubisco activities, properties, and regulation in three different C4 grasses under drought. *Journal of Experimental Botany*, 61, 2355-66.
- Castrillo, M. 1995. Ribulose-1,5-bis-phosphate carboxylase activity in altitudinal populations of *Espeletia schultzei* Wedd. *Oecologia*, 101, 193-196.
- Davidi, D., Shamshoum, M., Guo, Z., et al. 2020. Highly active rubiscos discovered by systematic interrogation of natural sequence diversity. *The EMBO Journal*, 39, e104081.
- Galmés, J., Andralojc, P. J., Kapralov, M. V., Flexas, J., Keys, A. J., Molins, A., Parry, M. a. J. & Conesa, M. À. 2014a. Environmentally driven evolution of Rubisco and improved photosynthesis and growth within the C3 genus *Limonium* (Plumbaginaceae). *New Phytologist*, 203, 989-999.
- Galmés, J., Flexas, J., Keys, A. J., Cifre, J., Mitchell, R. A., Madgwick, P. J., Haslam, R. P., Medrano, H. & Parry, M. A. 2005. Rubisco specificity factor tends to be larger in plant species from drier habitats and in species with persistent leaves. *Plant, Cell & Environment*, 28, 571-579.
- Galmés, J., Kapralov, M. V., Andralojc, P. J., Conesa, M., Keys, A. J., Parry, M. A. & Flexas, J. 2014b. Expanding knowledge of the Rubisco kinetics variability in plant species: environmental and evolutionary trends. *Plant, Cell & Environment*, 37, 1989-2001.
- Hermida-Carrera, C., Kapralov, M. V. & Galmés, J. 2016. Rubisco Catalytic Properties and Temperature Response in Crops. *Plant Physiology*, 171, 2549-2561.
- Jordan, D. B. & Ogren, W. L. 1983. Species variation in kinetic properties of ribulose 1,5-bisphosphate carboxylase/oxygenase. *Archives of Biochemistry and Biophysics*, 227, 425-433.
- Kubien, D. S., Whitney, S. M., Moore, P. V. & Jesson, L. K. 2008. The biochemistry of Rubisco in *Flaveria*. *Journal of Experimental Botany*, 59, 1767-1777.
- Lehnherr, B., Mächler, F. & Nösberger, J. 1985. Influence of Temperature on the Ratio of Ribulose Bisphosphate Carboxylase to Oxygenase Activities and on the Ratio of Photosynthesis to Photorespiration of Leaves. *Journal of Experimental Botany*, 36, 1117-1125.
- Long, B. M., Hee, W. Y., Sharwood, R. E., et al. 2018. Carboxysome encapsulation of the CO<sub>2</sub>-fixing enzyme Rubisco in tobacco chloroplasts. *Nature Communications*, 9, 3570.
- Orr, D. J., Alcântara, A., Kapralov, M. V., Andralojc, P. J., Carmo-Silva, E. & Parry, M. a. J. 2016. Surveying Rubisco Diversity and Temperature Response to Improve Crop Photosynthetic Efficiency. *Plant Physiology*, 172, 707-717.
- Prins, A., Orr, D. J., Andralojc, P. J., Reynolds, M. P., Carmo-Silva, E. & Parry, M. A. 2016. Rubisco catalytic properties of wild and domesticated relatives provide scope for improving wheat photosynthesis. *Journal of Experimental Botany*, 67, 1827-38.
- Savir, Y., Noor, E., Milo, R. & Tlusty, T. 2010. Cross-species analysis traces adaptation of Rubisco toward optimality in a low-dimensional landscape. *Proceedings of the National Academy of Sciences*, 107, 3475-3480.
- Sharwood, R. E., Ghannoum, O., Kapralov, M. V., Gunn, L. H. & Whitney, S. M. 2016. Temperature responses of Rubisco from Paniceae grasses provide opportunities for improving C3 photosynthesis. *Nature Plant*, 2, 16186.
- Uemura, K., Anwaruzzaman, Miyachi, S. & Yokota, A. 1997. Ribulose-1,5-Bisphosphate Carboxylase/Oxygenase from Thermophilic Red Algae with a Strong Specificity for CO<sub>2</sub> Fixation. *Biochemical and Biophysical Research Communications*, 233, 568-571.
- Viiil, J., Ivanova, H. & Pärnik, T. 2012. Specificity factor of Rubisco: estimation in intact leaves by carboxylation at different CO<sub>2</sub>/O<sub>2</sub> ratios. *Photosynthetica*, 50, 247-253.
